# Supplementary material for: Rh(iii)-catalyzed C-7 arylation of indolines with arylsilanes via C–H activation
Source: Royal Society of Chemistry journal article supplement (doi:10.1039/c9ra04142g), 2019-01-01

## Electronic Supplementary Information

### **Rh(III)-Catalyzed C-7 Arylation of Indolines with Arylsilanes**

Haiqing Luo,\* Qi Xie, Kai Sun, Jianbo Deng, Lin Xu, Kejun Wang, Xuzhong Luo\*  
*Department of Chemistry & Chemical Engineering, Gannan Normal University,  
Ganzhou 341000, China.*

#### Table of Contents

|      |                                               |    |
|------|-----------------------------------------------|----|
| I .  | General Informations.....                     | 2  |
| II . | Experimental Procedures. ....                 | 3  |
| III. | Spectroscopic Data for Arylated Products..... | 5  |
| IV.  | References. ....                              | 18 |
| V.   | NMR Spectra.....                              | 19 |

## I. General Informations

**Analytical methods:** Proton nuclear magnetic resonance ( $^1\text{H}$  NMR) and carbon nuclear magnetic resonance ( $^{13}\text{C}$  NMR) spectroscopy were performed on a Bruker Advance 300, 400 and 500 NMR spectrometers. Chemical shifts  $^1\text{H}$  NMR spectra are reported as in units of parts per million (ppm) downfield from  $\text{SiMe}_4$  (0.0) and relative to the signal of chloroform-*d* ( $J = 7.264$ , singlet). Multiplicities were given as: s (singlet); d (doublet); t (triplet); q (quartet); dd (doublet of doublets); ddd (doublet of doublets of doublets); dddd (doublet of doublets of doublets of doublets); dt (doublet of triplets); m (multiplets) and etc. The number of protons (*n*) for a given resonance is indicated by *n*H. Coupling constants are reported as a *J* value in Hz. Carbon nuclear magnetic resonance spectra ( $^{13}\text{C}$  NMR) are reported as *d* in units of parts per million (ppm) downfield from  $\text{SiMe}_4$  (0.0) and relative to the signal of chloroform-*d* ( $J = 77.03$ , triplet). High resolution mass spectral analysis (HRMS) was performed on Water XVEO G2 Q-TOF (Waters Corporation). Infrared spectra were recorded on a Nicolet IS50 Fourier transform spectrometer (FT-IR) and are reported in wave numbers ( $\text{cm}^{-1}$ ).

**Materials:** All commercial available reagents were used without further purification unless otherwise noted. It must be point out that tetrahydrofuran was dried by sodium and distilled until the diphenylmethanone turned blue. All substituted indoline,<sup>1-2</sup> arylsilanes<sup>3</sup> were prepared according to the known methods (Scheme 1). In addition, column chromatography was performed using 200-300 mesh silica gels.

### i) Synthesis of various *N*-(2-pyrimidyl)-indolines **1**

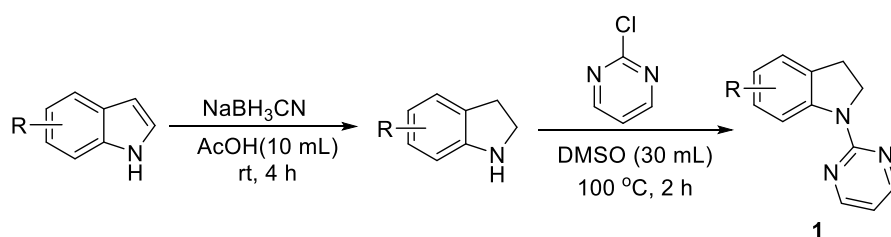

### ii) Synthesis of various arylsilanes **2**

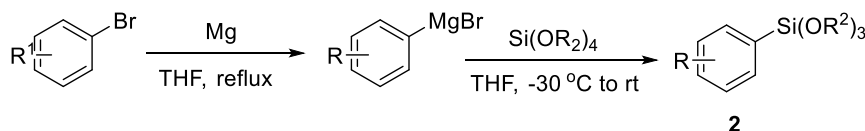

Scheme 1

## II. Experimental Procedures

### 1. General procedure for Rh(III)-catalyzed C-7 arylation of indoline with arylsilanes

To a septum capped 15 mL of dried sealed tube with a magnetic stirring bar were added 1-(pyrimidin-2-yl)indoline (**1f**, 0.3 mmol), [Cp\*RhCl<sub>2</sub>]<sub>2</sub> (1.9 mg 1 mol%), CuSO<sub>4</sub> (95.8 mg, 0.6 mmol), AgF (114.2 mg, 0.9 mmol) and 2 mL Dioxane, followed by addition of triethoxy(phenyl)silane (**2a**, 217.2  $\mu$ L, 0.9 mmol) by microsyringe. The sealed tube was screw capped and heated to 80 °C for 24 h (oil bath). After completed, the reaction was cooled to room temperature, and then the mixture was diluted with 10 mL water. The aqueous layer was extracted with ethyl acetate (10 mL  $\times$  3). The combined organic layers were washed with brine, dried over Na<sub>2</sub>SO<sub>4</sub>, filtered and concentrated in vacuo. The residue was purified with silica gel chromatography (petroleum ether/ethyl acetate) to provide pure product **3fa**.

### 2. Rh(III)-catalyzed the direct C-8 arylation of *N*-(2-pyrimidyl)-tetrahydroquinoline with phenyltriethoxysilane

To a septum capped 15 mL of dried sealed tube with a magnetic stirring bar were added *N*-(2-pyrimidyl)-tetrahydroquinoline (**5**, 63.4 mg, 0.3 mmol), [Cp\*RhCl<sub>2</sub>]<sub>2</sub> (1.9 mg 1 mol%), CuSO<sub>4</sub> (95.8 mg, 0.6 mmol), AgF (114.2 mg, 0.9 mmol) and 2 mL Dioxane, followed by addition of triethoxy(phenyl)silane (**2a**, 217.2  $\mu$ L, 0.9 mmol) by microsyringe. The sealed tube was screw capped and heated to 80 °C for 24 h (oil bath). After completed, the reaction was cooled to room temperature, and then the mixture was diluted with 10 mL water. The aqueous layer was extracted with ethyl acetate (10 mL  $\times$  3). The combined organic layers were washed with brine, dried over Na<sub>2</sub>SO<sub>4</sub>, filtered and concentrated in vacuo. The residue was purified with silica gel chromatography (petroleum ether/ethyl acetate) to provide pure product **6** (41.4 mg, 48 %).

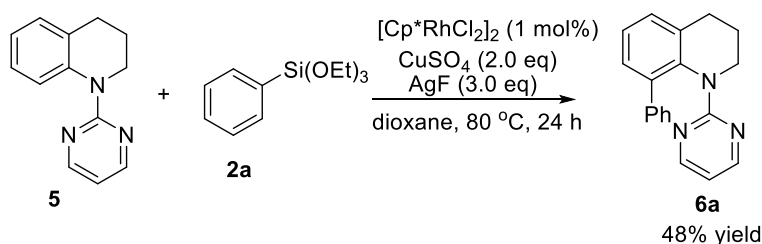

### 3. Transformation of C-7-arylated indoline **3fa** to the corresponding indole<sup>[4]</sup>

To a stirred solution of 7-phenyl-1-(pyrimidin-2-yl)indoline **3fa** (0.1 mmol) in 1,4-dioxane, DDQ (0.2 mmol) was added at room temperature. The resultant solution was further stirred at 90 °C for 15 h. After completion, as indicated by TLC, the reaction mixture was cooled to room temperature and diluted with ethyl acetate (1  $\times$  20 mL). The mixture was successively washed with brine (2  $\times$  10 mL) and water (10 mL). Drying (Na<sub>2</sub>SO<sub>4</sub>) and evaporation of the solvent gave a residue that was purified on silica gel column chromatography using n-hexane and ethyl acetate as an eluent to afford 7-phenyl-1-(pyrimidin-2-yl)-1H-indole **7** as a yellowish liquid. Next, indole **7** was dissolved

in DMSO (2 mL) and NaOEt (5 equiv.) in EtOH (0.5 mL) was added to the mixture. The mixture was stirred at 100 °C for 3 h. After completion, the reaction mixture was cooled to room temperature and diluted with ethyl acetate (1 x 15 mL). The mixture was then washed with 2 N HCl (1 x 10 mL), brine (2 x 10 mL) and water (10 mL). Drying (Na<sub>2</sub>SO<sub>4</sub>) and evaporation of the solvent gave a residue that was purified on silica gel column chromatography using n-hexane and ethyl acetate as an eluent to afford 7-phenyl-1H-indole **7a** as a brown liquid.

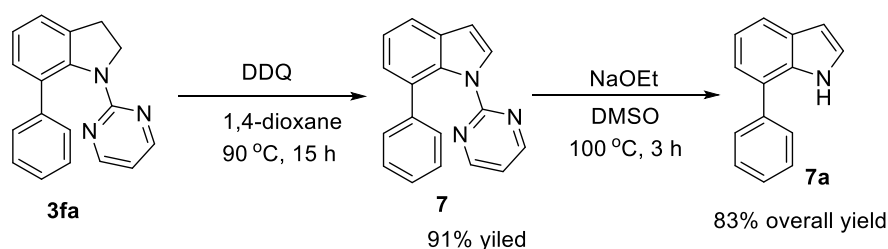

#### 4. Parallel kinetic Isotope experiment<sup>[4]</sup>

In a set of two experiments: in first set, Phenyl-triethoxysilane **2a** (0.6 mmol) was reacted with 1-(pyrimidin-2-yl)indoline **1f** (0.2 mmol) for 15 min under standard reaction condition. Whereas in another set, 1-(pyrimidin-2-yl)indoline-7-*d* **1f-d** (0.2 mmol, 97% D) was used instead of **1f** in the reaction with Phenyl-triethoxysilane **2a** (0.6 mmol) under the standard reaction conditions. The two reactions were allowed to stir at 80 °C for 15 min. For the both cases, The aqueous layer was extracted with ethyl acetate (10 mL x 3). The combined organic layers were washed with brine, dried over Na<sub>2</sub>SO<sub>4</sub>, filtered and concentrated in vacuo. The residue was purified with silica gel chromatography (petroleum ether/ethyl acetate) to provide pure product **3fa**. The yield of **3fa** was obtained as 24% (13.1 mg) and 31% yields (16.9 mg), respectively. The KIE value of 0.80 was determined by the ratio of obtained yield of **3fa** (KIE = 24%/31%/97% = 0.80).

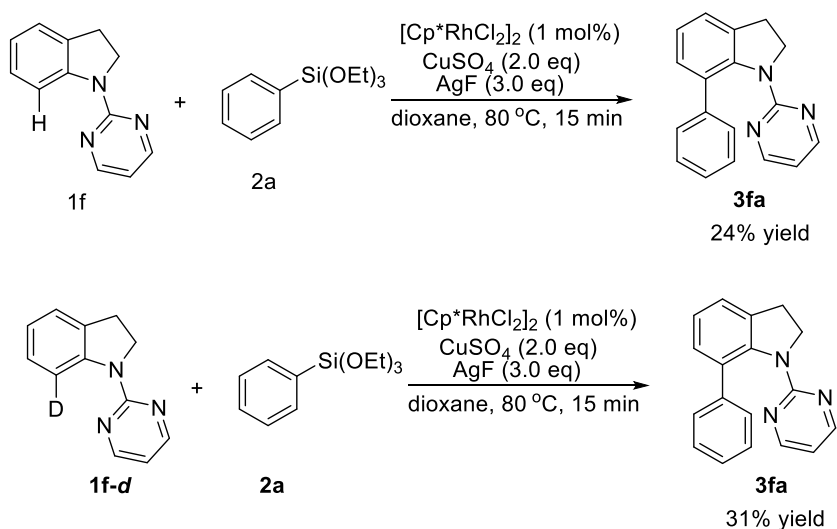

### III. Spectroscopic Data for Arylated Products

#### 7-phenyl-1-(pyrimidin-2-yl)indoline (3fa)

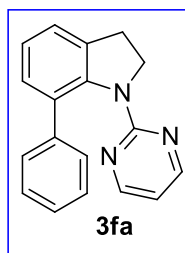

The product **3fa** was purified with silica gel chromatography (Petroleum ether /Ethyl Acetate = 8:1, R<sub>f</sub> = 0.35) to give product as a yellowish solid (80.4 mg, 98% yield).

**<sup>1</sup>H NMR** (400 MHz, Chloroform-*d*) δ 7.95 (d, *J* = 4.8 Hz, 2H), 7.34 (dd, *J* = 8.2, 1.2 Hz, 2H), 7.30 – 7.20 (m, 2H), 7.19 – 7.04 (m, 4H), 6.36 (t, *J* = 4.8 Hz, 1H), 4.45 (t, *J* = 7.9 Hz, 2H), 3.18 (t, *J* = 7.9 Hz, 2H).

**<sup>13</sup>C NMR** (101 MHz, Chloroform-*d*) δ 159.13, 156.43, 142.21, 141.01, 134.90, 130.30, 128.89, 127.83, 126.62, 125.97, 123.69, 123.57, 111.72, 52.13, 29.51.

**IR** (KBr disk): 3028, 2957, 2848, 1687, 1576, 1551, 1456, 1421, 1128 cm<sup>-1</sup>.

This compound is known. <sup>[4]</sup>

#### 1-(pyrimidin-2-yl)-7-(p-tolyl)indoline (3fb)

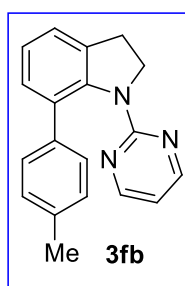

The product **3fb** was purified with silica gel chromatography (Petroleum ether /Ethyl Acetate = 10:1, R<sub>f</sub> = 0.45) to give product as a yellowish solid (81.7 mg, 95% yield).

**<sup>1</sup>H NMR** (400 MHz, Chloroform-*d*) δ 7.96 (d, *J* = 4.8 Hz, 2H), 7.31 – 7.16 (m, 4H), 7.08 (t, *J* = 7.5 Hz, 1H), 6.95 (d, *J* = 7.9 Hz, 2H), 6.36 (t, *J* = 4.8 Hz, 1H), 4.44 (t, *J* = 7.9 Hz, 2H), 3.16 (t, *J* = 7.9 Hz, 2H), 2.25 (s, 3H).

**<sup>13</sup>C NMR** (101 MHz, Chloroform-*d*) δ 159.20, 156.41, 140.95, 139.18, 135.55, 134.84, 130.30, 128.82, 128.48, 126.39, 123.68, 123.29, 111.69, 52.14, 29.52, 21.02.

**IR** (KBr disk): 3023, 2994, 2847, 1607, 1517, 1451, 1379, 1273, 1216 cm<sup>-1</sup>.

**HRMS (ESI)** calcd for C<sub>19</sub>H<sub>18</sub>N<sub>3</sub><sup>+</sup> [M + H]<sup>+</sup> 288.1495, found: 288.1498.

#### 7-(3,5-dimethylphenyl)-1-(pyrimidin-2-yl)indoline (3fc)

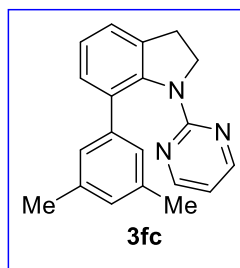

The product **3fc** was purified with silica gel chromatography (Petroleum ether /Ethyl Acetate = 9:1,  $R_f$  = 0.30) to give product as a yellowish solid (81.4 mg, 90% yield).

**$^1\text{H}$  NMR** (400 MHz, Chloroform-*d*)  $\delta$  7.94 (d,  $J$  = 4.8 Hz, 2H), 7.26 (dd,  $J$  = 7.7, 1.0 Hz, 1H), 7.19 (dd,  $J$  = 7.3, 1.1 Hz, 1H), 7.06 (t,  $J$  = 7.5 Hz, 1H), 6.95 (s, 2H), 6.72 (s, 1H), 6.35 (t,  $J$  = 4.8 Hz, 1H), 4.43 (t,  $J$  = 7.9 Hz, 2H), 3.15 (t,  $J$  = 7.9 Hz, 2H), 2.15 (s, 6H).

**$^{13}\text{C}$  NMR** (101 MHz, Chloroform-*d*)  $\delta$  159.02, 156.16, 141.75, 140.81, 137.09, 134.62, 129.81, 128.71, 127.40, 124.39, 123.36, 123.28, 111.51, 52.04, 29.39, 20.98.

**IR** (KBr disk): 3025, 2964, 2914, 2878, 2839, 1573, 1465, 1414, 1277  $\text{cm}^{-1}$ .

**HRMS (ESI)** calcd for  $\text{C}_{20}\text{H}_{20}\text{N}_3^+$  [ $\text{M} + \text{H}$ ] $^+$  302.1652, found: 302.1656.

#### 1-(pyrimidin-2-yl)-7-(o-tolyl)indoline (**3fd**)

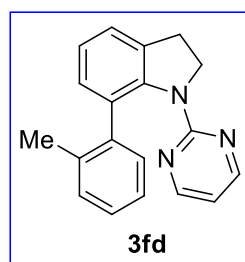

The product **3fd** was purified with silica gel chromatography (Petroleum ether /Ethyl Acetate = 7:1,  $R_f$  = 0.50) to give product as a yellow liquid (28.4 mg, 33% yield).

**$^1\text{H}$  NMR** (400 MHz, Chloroform-*d*)  $\delta$  7.92 (d,  $J$  = 4.8 Hz, 2H), 7.25 – 7.21 (m, 1H), 7.16 – 7.10 (m, 2H), 7.06 (t,  $J$  = 7.4 Hz, 1H), 7.04 – 6.97 (m, 3H), 6.34 (t,  $J$  = 4.8 Hz, 1H), 4.37 (t,  $J$  = 7.9 Hz, 2H), 3.17 (t,  $J$  = 7.9 Hz, 2H), 2.18 (s, 3H).

**$^{13}\text{C}$  NMR** (101 MHz, Chloroform-*d*)  $\delta$  158.85, 156.17, 141.93, 141.48, 134.72, 134.41, 129.85, 129.74, 129.45, 128.66, 126.20, 125.12, 123.40, 122.87, 111.56, 51.77, 29.39, 19.67.

**IR** (KBr disk): 3021, 2963, 2921, 2878, 1575, 1550, 1457, 1382, 1283, 1081  $\text{cm}^{-1}$ .

This compound is known.<sup>[4]</sup>

#### 7-(4-(tert-butyl)phenyl)-1-(pyrimidin-2-yl)indoline (**3fe**)

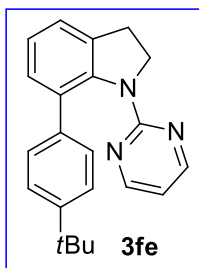

The product **3fe** was purified with silica gel chromatography (Petroleum ether /Ethyl Acetate = 7:1,  $R_f$  = 0.40) to give product as a yellow solid (89.1 mg, 90% yield).

**$^1\text{H}$  NMR** (400 MHz, Chloroform- $d$ )  $\delta$  7.90 (d,  $J$  = 4.8 Hz, 2H), 7.28 (d,  $J$  = 7.7 Hz, 1H), 7.25 – 7.19 (m, 3H), 7.18 – 7.12 (dt,  $J$  = 8.52, 1.96 Hz, 2H), 7.08 (t,  $J$  = 7.5 Hz, 1H), 6.31 (t,  $J$  = 4.8 Hz, 1H), 4.43 (t,  $J$  = 7.9 Hz, 2H), 3.17 (t,  $J$  = 7.9 Hz, 2H), 1.25 (s, 9H).

**$^{13}\text{C}$  NMR** (101 MHz, Chloroform- $d$ )  $\delta$  158.91, 156.19, 149.11, 141.08, 139.18, 134.75, 129.82, 128.68, 126.27, 124.58, 123.50, 123.36, 111.37, 52.08, 34.33, 31.38, 29.49.

**IR** (KBr disk): 3029, 2954, 2900, 2865, 1576, 1455, 1433, 1266, 1194, 1109  $\text{cm}^{-1}$ .

**HRMS (ESI)** calcd for  $\text{C}_{22}\text{H}_{24}\text{N}_3^+$  [ $\text{M} + \text{H}$ ] $^+$  330.1965, found: 330.1966.

#### 7-(4-methoxyphenyl)-1-(pyrimidin-2-yl)indoline (**3ff**)

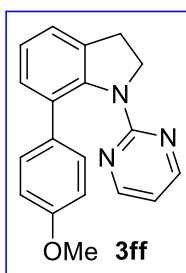

The product **3ff** was purified with silica gel chromatography (Petroleum ether /Ethyl Acetate = 7:1,  $R_f$  = 0.40) to give product as a yellow solid (78.3 mg, 86 % yield).

**$^1\text{H}$  NMR** (400 MHz, Chloroform- $d$ )  $\delta$  7.99 (d,  $J$  = 4.8 Hz, 2H), 7.30 – 7.22 (m, 3H), 7.20 (dd,  $J$  = 7.3, 1.1 Hz, 1H), 7.09 (d,  $J$  = 7.5 Hz, 1H), 6.74 – 6.60 (m, 2H), 6.39 (t,  $J$  = 4.8 Hz, 1H), 4.44 (t,  $J$  = 7.9 Hz, 2H), 3.73 (s, 3H), 3.16 (t,  $J$  = 7.9 Hz, 2H).

**$^{13}\text{C}$  NMR** (101 MHz, Chloroform- $d$ )  $\delta$  159.16, 158.00, 156.44, 140.92, 134.89, 134.73, 130.00, 128.69, 127.62, 123.72, 123.12, 113.24, 111.73, 55.17, 52.20, 29.53.

**IR** (KBr disk): 3030, 2992, 2974, 2933, 2846, 1578, 1451, 1431, 1279, 1238, 1175  $\text{cm}^{-1}$ .

**HRMS (ESI)** calcd for  $\text{C}_{19}\text{H}_{18}\text{N}_3\text{O}^+$  [ $\text{M} + \text{H}$ ] $^+$  304.1445, found: 304.1449.

#### 7-(3-methoxyphenyl)-1-(pyrimidin-2-yl)indoline (**3fg**)

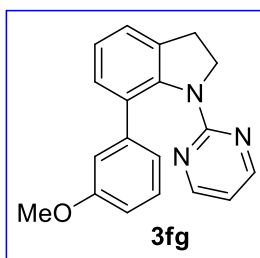

The product **3fg** was purified with silica gel chromatography (Petroleum ether /Ethyl Acetate

= 9:1, R<sub>f</sub> = 0.30) to give product as a yellow solid (87.0 mg, 96 % yield).

**<sup>1</sup>H NMR** (400 MHz, Chloroform-*d*) δ 7.98 (d, *J* = 4.8 Hz, 2H), 7.28 (d, *J* = 7.7 Hz, 1H), 7.25 – 7.19 (m, 1H), 7.06 (dt, *J* = 15.4, 7.7 Hz, 2H), 6.94 (dt, *J* = 7.6, 1.1 Hz, 1H), 6.92 – 6.90 (m, 1H), 6.65 (ddd, *J* = 8.2, 2.6, 0.9 Hz, 1H), 6.37 (t, *J* = 4.8 Hz, 1H), 4.44 (t, *J* = 8.0 Hz, 2H), 3.65 (s, 3H), 3.15 (t, *J* = 7.9 Hz, 2H).

**<sup>13</sup>C NMR** (101 MHz, Chloroform-*d*) δ 159.25, 159.08, 156.31, 143.36, 140.78, 134.77, 129.74, 128.69, 128.65, 123.57, 123.53, 119.18, 112.22, 111.72, 111.35, 55.01, 52.03, 29.34.

**IR** (KBr disk): 3000, 2955, 2882, 1575, 1548, 1472, 1429, 1292, 1225, 1171 cm<sup>-1</sup>.

This compound is known.<sup>[4]</sup>

### 7-(benzo[d][1,3]dioxol-5-yl)-1-(pyrimidin-2-yl)indoline (3fh)

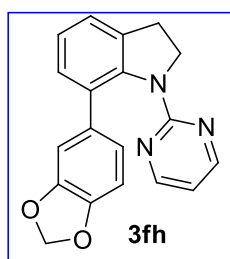

The product **3fh** was purified with silica gel chromatography (Petroleum ether /Ethyl Acetate = 10:1, R<sub>f</sub> = 0.25) to give product as a yellowish solid (78.3 mg, 82% yield).

**<sup>1</sup>H NMR** (400 MHz, Chloroform-*d*) δ 8.04 (d, *J* = 4.8 Hz, 2H), 7.20 (t, *J* = 6.7 Hz, 2H), 7.07 (t, *J* = 7.5 Hz, 1H), 6.88 (d, *J* = 1.6 Hz, 1H), 6.82 (dd, *J* = 8.0, 1.7 Hz, 1H), 6.60 (d, *J* = 8.0 Hz, 1H), 6.43 (t, *J* = 4.8 Hz, 1H), 5.83 (s, 2H), 4.43 (t, *J* = 7.9 Hz, 2H), 3.14 (t, *J* = 7.9 Hz, 2H).

**<sup>13</sup>C NMR** (101 MHz, Chloroform-*d*) δ 159.21, 156.42, 147.21, 145.65, 140.83, 136.23, 134.89, 129.98, 128.61, 123.65, 123.27, 119.99, 111.78, 107.72, 107.27, 100.51, 52.06, 29.44.

**IR** (KBr disk): 3027, 2958, 2894, 1575, 1552, 1467, 1423, 1252, 1226, 1036 cm<sup>-1</sup>.

**HRMS (ESI)** calcd for C<sub>19</sub>H<sub>16</sub>N<sub>3</sub>O<sub>2</sub><sup>+</sup> [M + H]<sup>+</sup> 318.1237, found: 318.1238.

### 7-([1,1'-biphenyl]-4-yl)-1-(pyrimidin-2-yl)indoline (3fi)

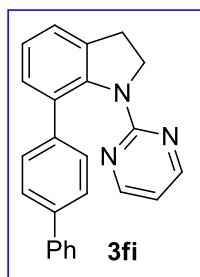

The product **3fi** was purified with silica gel chromatography (Petroleum ether /Ethyl Acetate = 7:1, R<sub>f</sub> = 0.50) to give product as a yellowish solid (82.0 mg, 78 % yield).

**<sup>1</sup>H NMR** (400 MHz, Chloroform-*d*) δ 7.94 (d, *J* = 4.8 Hz, 2H), 7.52 (dt, *J* = 8.1, 1.8 Hz, 2H), 7.40 (d, *J* = 6.0 Hz, 6H), 7.30 (tdd, *J* = 7.3, 5.2, 2.5 Hz, 2H), 7.26 – 7.18 (m, 1H), 7.11 (t, *J* = 7.5 Hz, 1H), 6.31 (t, *J* = 4.8 Hz, 1H), 4.46 (t, *J* = 7.9 Hz, 2H), 3.16 (t, *J* = 7.9 Hz, 2H).



**<sup>13</sup>C NMR** (101 MHz, Chloroform-*d*)  $\delta$  159.05, 156.35, 141.20, 140.99, 140.78, 138.63, 134.87, 129.64, 128.66, 128.59, 126.96, 126.91, 126.73, 126.43, 123.63, 123.60, 111.76, 52.06, 29.42.

**IR** (KBr disk): 3034, 2959, 2913, 2842, 1574, 1548, 1454, 1436, 1329, 1285, 1184, 1042  $\text{cm}^{-1}$ .

**HRMS (ESI)** calcd for  $\text{C}_{24}\text{H}_{20}\text{N}_3^+$   $[\text{M} + \text{H}]^+$  350.1652, found: 350.1657.

#### 7-(4-fluorophenyl)-1-(pyrimidin-2-yl)indoline (3fj)

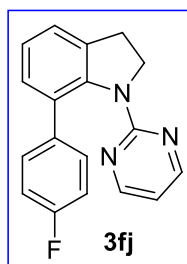

The product **3fj** was purified with silica gel chromatography (Petroleum ether /Ethyl Acetate = 8:1,  $R_f$  = 0.30) to give product as a yellowish solid (84.6 mg, 97% yield).

**<sup>1</sup>H NMR** (400 MHz, Chloroform-*d*)  $\delta$  7.99 (d,  $J$  = 4.8 Hz, 2H), 7.30 (ddd,  $J$  = 8.4, 5.3, 2.6 Hz, 2H), 7.26 – 7.19 (m, 2H), 7.16 – 7.05 (m, 1H), 6.92 – 6.78 (m, 2H), 6.41 (t,  $J$  = 4.8 Hz, 1H), 4.44 (t,  $J$  = 7.9 Hz, 2H), 3.16 (t,  $J$  = 7.9 Hz, 2H).

**<sup>13</sup>C NMR** (101 MHz, Chloroform-*d*)  $\delta$  161.37 (d,  $J_{\text{C-F}}$  = 244.9 Hz), 159.12, 156.52, 140.99, 138.23 (d,  $J_{\text{C-F}}$  = 3.4 Hz), 135.02, 129.37, 128.70, 128.11 (d,  $J_{\text{C-F}}$  = 7.9 Hz), 123.77, 123.66, 114.64 (d,  $J_{\text{C-F}}$  = 21.2 Hz), 111.94, 52.17, 29.47.

**IR** (KBr disk): 3049, 2959, 2885, 1575, 1549, 1509, 1454, 1428, 1212, 1154  $\text{cm}^{-1}$ .

This compound is known. <sup>[4]</sup>

#### 7-(4-chlorophenyl)-1-(pyrimidin-2-yl)indoline (3fk)

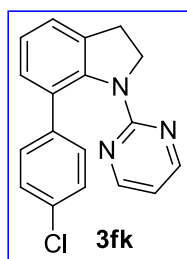

The product **3fk** was purified with silica gel chromatography (Petroleum ether /Ethyl Acetate = 7:1,  $R_f$  = 0.45) to give product as a yellow solid (90.5 mg, 98% yield).

**<sup>1</sup>H NMR** (400 MHz, Chloroform-*d*)  $\delta$  8.00 (d,  $J$  = 4.8 Hz, 2H), 7.31 – 7.26 (m, 2H), 7.26 – 7.20 (m, 2H), 7.16 – 7.07 (m, 3H), 6.43 (t,  $J$  = 4.8 Hz, 1H), 4.45 (t,  $J$  = 8.0 Hz, 2H), 3.17 (t,  $J$  = 7.9 Hz, 2H).

**<sup>13</sup>C NMR** (101 MHz, Chloroform-*d*)  $\delta$  159.11, 156.57, 140.95, 140.73, 135.05, 131.72, 129.16, 128.63, 127.97, 127.90, 123.89, 123.81, 112.09, 52.13, 29.43.

**IR** (KBr disk): 3030, 2963, 2914, 2850, 1576, 1548, 1451, 1425, 1285, 1266, 1087  $\text{cm}^{-1}$ .

This compound is known.<sup>[4]</sup>

**1-(pyrimidin-2-yl)-7-(4-(trifluoromethyl)phenyl)indoline (3fl)**

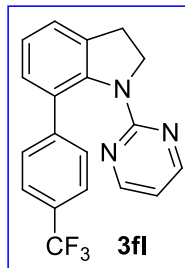

The product **3fl** was purified with silica gel chromatography (Petroleum ether /Ethyl Acetate = 7:1,  $R_f$  = 0.40) to give product as a yellowish solid (94.2 mg, 92% yield).

**<sup>1</sup>H NMR** (400 MHz, Chloroform-*d*)  $\delta$  7.95 (d,  $J$  = 4.8 Hz, 2H), 7.43 (q,  $J$  = 8.4 Hz, 4H), 7.31 – 7.20 (m, 2H), 7.12 (t,  $J$  = 7.5 Hz, 1H), 6.40 (t,  $J$  = 4.8 Hz, 1H), 4.46 (t,  $J$  = 8.0 Hz, 2H), 3.18 (t,  $J$  = 8.0 Hz, 2H).

**<sup>13</sup>C NMR** (101 MHz, Chloroform-*d*)  $\delta$  158.94, 156.49, 145.99 (d,  $J_{\text{C-F}}$  = 1.6 Hz), 141.04, 135.11, 128.80, 128.63, 128.03 (q,  $J_{\text{C-F}}$  = 32.2 Hz), 126.83, 124.73 (q,  $J_{\text{C-F}}$  = 3.8 Hz), 124.36, 123.79, 112.07, 52.05, 29.33.

**IR** (KBr disk): 3047, 2956, 2899, 2848, 1616, 1578, 1553, 1463, 1435, 1328, 1287, 1156, 1110, 1067  $\text{cm}^{-1}$ .

**HRMS (ESI)** calcd for  $\text{C}_{19}\text{H}_{15}\text{F}_3\text{N}_3^+$  [ $M + H$ ]<sup>+</sup> 342.1213, found: 342.1213.

**1-(pyrimidin-2-yl)-7-(thiophen-2-yl)indoline (3fm)**

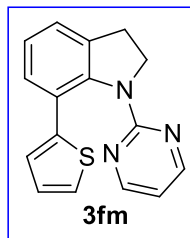

The product **3fm** was purified with silica gel chromatography (Petroleum ether /Ethyl Acetate = 6:1,  $R_f$  = 0.50) to give product as a yellow solid (43.3 mg, 52% yield).

**<sup>1</sup>H NMR** (400 MHz, Chloroform-*d*)  $\delta$  8.12 (d,  $J$  = 4.8 Hz, 2H), 7.39 – 7.33 (m, 1H), 7.21 (dd,  $J$  = 7.3, 1.1 Hz, 1H), 7.11 – 7.03 (m, 2H), 6.93 (dd,  $J$  = 3.6, 1.1 Hz, 1H), 6.78 (dd,  $J$  = 5.1, 3.6 Hz, 1H), 6.49 (t,  $J$  = 4.8 Hz, 1H), 4.47 (t,  $J$  = 7.9 Hz, 2H), 3.15 (t,  $J$  = 7.9 Hz, 2H).

**<sup>13</sup>C NMR** (101 MHz, Chloroform-*d*)  $\delta$  159.86, 156.64, 143.57, 141.34, 135.27, 128.71, 126.54, 124.00, 123.91, 123.82, 112.12, 52.58, 29.62.

**IR** (KBr disk): 3030, 2967, 2887, 2841, 1573, 1552, 1447, 1414, 1351, 1280, 1228, 1183, 1045  $\text{cm}^{-1}$ .

**HRMS (ESI)** calcd for  $\text{C}_{16}\text{H}_{14}\text{N}_3\text{S}^+$  [ $M + H$ ]<sup>+</sup> 280.0903, found: 280.0909.

**5-methyl-7-phenyl-1-(pyrimidin-2-yl)indoline (4ga)**

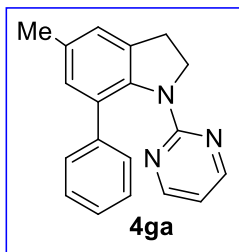

The product **4ga** was purified with silica gel chromatography (Petroleum ether /Ethyl Acetate = 7:1,  $R_f$  = 0.40) to give product as a fawn solid (84.5 mg, 98% yield).

**$^1\text{H}$  NMR** (400 MHz, Chloroform-*d*)  $\delta$  7.97 (d,  $J$  = 4.8 Hz, 2H), 7.39 (dt,  $J$  = 8.2, 1.8 Hz, 2H), 7.22 – 7.16 (m, 2H), 7.15 – 7.07 (m, 3H), 6.36 (t,  $J$  = 4.8 Hz, 1H), 4.48 (t,  $J$  = 7.9 Hz, 2H), 3.15 (t,  $J$  = 7.8 Hz, 2H), 2.40 (s, 3H).

**$^{13}\text{C}$  NMR** (101 MHz, Chloroform-*d*)  $\delta$  156.32, 142.09, 134.99, 133.25, 130.01, 129.12, 127.68, 126.49, 125.81, 124.22, 111.36, 52.09, 29.43, 20.88.

**IR** (KBr disk): 3027, 2913, 2887, 2850, 1603, 1576, 1548, 1471, 1449, 1225, 1101  $\text{cm}^{-1}$ .

This compound is known.<sup>[4]</sup>

#### 5-methoxy-7-phenyl-1-(pyrimidin-2-yl)indoline (**4ha**)

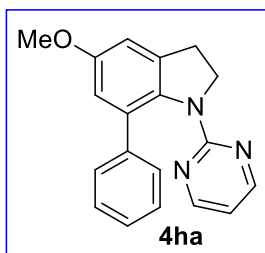

The product **4ha** was purified with silica gel chromatography (Petroleum ether /Ethyl Acetate = 8:1,  $R_f$  = 0.30) to give product as a yellow solid (85.6 mg, 94 % yield).

**$^1\text{H}$  NMR** (400 MHz, Chloroform-*d*)  $\delta$  7.93 (d,  $J$  = 4.8 Hz, 2H), 7.45 – 7.31 (m, 2H), 7.19 – 7.12 (m, 2H), 7.12 – 7.06 (m, 1H), 6.83 (s, 2H), 6.31 (t,  $J$  = 4.8 Hz, 1H), 4.45 (t,  $J$  = 7.8 Hz, 2H), 3.81 (s, 3H), 3.12 (t,  $J$  = 7.8 Hz, 2H).

**$^{13}\text{C}$  NMR** (101 MHz, Chloroform-*d*)  $\delta$  159.24, 156.56, 156.40, 141.92, 136.49, 134.52, 131.05, 127.78, 126.48, 126.11, 113.21, 111.23, 110.06, 55.66, 52.20, 29.87.

**IR** (KBr disk): 3007, 2939, 2881, 2842, 1600, 1577, 1549, 1470, 1431, 1336, 1177  $\text{cm}^{-1}$ .

This compound is known.<sup>[4]</sup>

#### 5-(benzyloxy)-7-phenyl-1-(pyrimidin-2-yl)indoline (**4ia**)

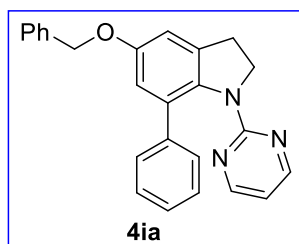

The product **4ia** was purified with silica gel chromatography (Petroleum ether /Ethyl Acetate = 6:1,  $R_f$  = 0.20) to give product as a yellowish solid (98.3 mg, 86% yield).

**$^1\text{H}$  NMR** (400 MHz, Chloroform-*d*)  $\delta$  7.96 (d,  $J$  = 4.7 Hz, 2H), 7.47 (d,  $J$  = 7.2 Hz, 2H), 7.44 – 7.30 (m, 5H), 7.15 (dt,  $J$  = 26.4, 7.2 Hz, 3H), 7.00 – 6.89 (m, 2H), 6.35 (t,  $J$  = 4.7 Hz, 1H), 5.11 (s, 2H), 4.48 (t,  $J$  = 7.8 Hz, 2H), 3.14 (t,  $J$  = 7.8 Hz, 2H).

**$^{13}\text{C}$  NMR** (101 MHz, Chloroform-*d*)  $\delta$  159.27, 156.44, 155.84, 141.93, 137.16, 136.50, 134.79, 131.10, 128.48, 127.83, 127.81, 127.37, 126.53, 126.15, 114.50, 111.30, 110.91, 70.51, 52.24, 29.92.

**IR** (KBr disk): 3031, 2916, 2854, 1609, 1577, 1547, 1467, 1445, 1412, 1375, 1354, 1244, 1225, 1189, 1166  $\text{cm}^{-1}$ .

This compound is known.<sup>[4]</sup>

#### 5-fluoro-7-phenyl-1-(pyrimidin-2-yl)indoline (**4ja**)

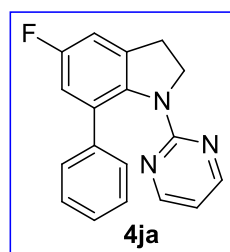

The product **4ja** was purified with silica gel chromatography (Petroleum ether /Ethyl Acetate = 8:1,  $R_f$  = 0.25) to give product as a light brown yellow solid (75.6 mg, 86% yield).

**$^1\text{H}$  NMR** (400 MHz, Chloroform-*d*)  $\delta$  7.94 (d,  $J$  = 4.8 Hz, 2H), 7.33 (d,  $J$  = 7.2 Hz, 2H), 7.15 (t,  $J$  = 7.3 Hz, 2H), 7.10 (dd,  $J$  = 8.4, 6.0 Hz, 1H), 6.97 (ddd,  $J$  = 18.2, 8.9, 2.3 Hz, 2H), 6.36 (t,  $J$  = 4.8 Hz, 1H), 4.47 (t,  $J$  = 7.9 Hz, 2H), 3.14 (t,  $J$  = 7.8 Hz, 2H).

**$^{13}\text{C}$  NMR** (101 MHz, Chloroform-*d*)  $\delta$  159.59 (d,  $J_{\text{C-F}}$  = 242.5 Hz), 159.09, 156.45, 141.05, 137.04 (d,  $J_{\text{C-F}}$  = 2.1 Hz), 136.88 (d,  $J_{\text{C-F}}$  = 8.9 Hz), 131.36 (d,  $J_{\text{C-F}}$  = 8.1 Hz), 127.92, 126.47, 126.37, 114.81 (d,  $J_{\text{C-F}}$  = 23.6 Hz), 111.8, 110.72 (d,  $J_{\text{C-F}}$  = 23.8 Hz), 52.4, 29.70 (d,  $J_{\text{C-F}}$  = 2.1 Hz).

**IR** (KBr disk): 3025, 2923, 2849, 1603, 1577, 1547, 1460, 1430, 1344, 1294, 1196, 1150

cm<sup>-1</sup>.

This compound is known.<sup>[4]</sup>

#### 5-chloro-7-phenyl-1-(pyrimidin-2-yl)indoline (4ka)

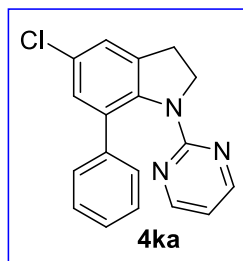

The product **4ka** was purified with silica gel chromatography (Petroleum ether /Ethyl Acetate = 7:1, R<sub>f</sub> = 0.30) to give product as a yellow solid (78.2 mg, 85% yield).

**<sup>1</sup>H NMR** (400 MHz, Chloroform-*d*) δ 7.94 (d, *J* = 4.8 Hz, 2H), 7.33 – 7.27 (m, 2H), 7.25 (t, *J* = 2.1 Hz, 1H), 7.21 – 7.06 (m, 4H), 6.38 (t, *J* = 4.8 Hz, 1H), 4.45 (t, *J* = 8.0 Hz, 2H), 3.14 (t, *J* = 8.0 Hz, 2H).

**<sup>13</sup>C NMR** (101 MHz, Chloroform-*d*) δ 158.87, 156.42, 140.89, 136.75, 131.23, 128.47, 128.40, 127.92, 126.45, 126.37, 123.50, 112.01, 52.17, 29.30.

**IR** (KBr disk): 3027, 2929, 2858, 1576, 1547, 1443, 1427, 1287, 1225, 1195 cm<sup>-1</sup>.

**HRMS (ESI)** calcd for C<sub>18</sub>H<sub>15</sub>ClN<sub>3</sub><sup>+</sup> [M + H]<sup>+</sup> 308.0949, found: 308.0955.

#### 4-bromo-7-phenyl-1-(pyrimidin-2-yl)indoline (4la)

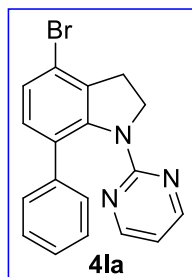

The product **4la** was purified with silica gel chromatography (Petroleum ether /Ethyl Acetate = 7:1, R<sub>f</sub> = 0.50) to give product as a brown solid (70.7 mg, 67 % yield).

**<sup>1</sup>H NMR** (400 MHz, Chloroform-*d*) δ 7.95 (d, *J* = 4.8 Hz, 2H), 7.32 – 7.26 (m, 2H), 7.23 (d, *J* = 8.3 Hz, 1H), 7.18 – 7.11 (m, 3H), 7.11 – 7.05 (m, 1H), 6.40 (t, *J* = 4.8 Hz, 1H), 4.46 (t, *J* = 8.1 Hz, 2H), 3.18 (t, *J* = 8.0 Hz, 2H).

**<sup>13</sup>C NMR** (101 MHz, Chloroform-*d*) δ 158.92, 156.43, 141.97, 141.28, 135.21, 130.52, 129.04, 127.92, 126.43, 126.32, 126.21, 118.20, 112.27, 51.40, 30.91.

**IR** (KBr disk): 3029, 2960, 2900, 1575, 1552, 1457, 1432, 1287, 1225, 1127 cm<sup>-1</sup>.

This compound is known.<sup>[4]</sup>

#### 5-bromo-7-phenyl-1-(pyrimidin-2-yl)indoline (4ma)

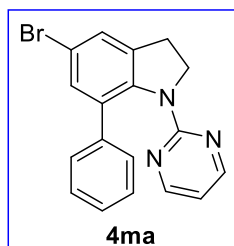

The product **4ma** was purified with silica gel chromatography (Petroleum ether /Ethyl Acetate = 7:1,  $R_f$  = 0.25) to give product as a yellow brown solid (66.7 mg, 63% yield).

**$^1\text{H}$  NMR** (400 MHz, Chloroform-*d*)  $\delta$  7.96 (d,  $J$  = 4.8 Hz, 2H), 7.41 (d,  $J$  = 2.0 Hz, 1H), 7.37 – 7.33 (m, 1H), 7.32 – 7.27 (m, 2H), 7.19 – 7.06 (m, 3H), 6.40 (t,  $J$  = 4.8 Hz, 1H), 4.45 (t,  $J$  = 8.0 Hz, 2H), 3.17 (t,  $J$  = 8.0 Hz, 2H).

**$^{13}\text{C}$  NMR** (101 MHz, Chloroform-*d*)  $\delta$  158.90, 156.49, 140.89, 140.32, 137.15, 131.75, 131.43, 127.98, 126.52, 126.45, 116.00, 112.12, 52.18, 29.28.

**IR** (KBr disk): 3027, 2920, 2854, 1575, 1550, 1463, 1441, 1292, 1223, 1192 $\text{cm}^{-1}$ .

This compound is known. <sup>[4]</sup>

#### 6-bromo-7-phenyl-1-(pyrimidin-2-yl)indoline (**4na**)

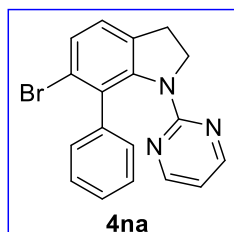

The product **4na** was purified with silica gel chromatography (Petroleum ether /Ethyl Acetate = 7:1,  $R_f$  = 0.30) to give product as a yellow solid (17.6 mg, 17 % yield).

**$^1\text{H}$  NMR** (400 MHz, Chloroform-*d*)  $\delta$  7.96 (d,  $J$  = 4.8 Hz, 2H), 7.38 (d,  $J$  = 7.9 Hz, 1H), 7.31 – 7.26 (m, 2H), 7.14 (t,  $J$  = 7.5 Hz, 2H), 7.07 (tt,  $J$  = 7.4, 3.8 Hz, 2H), 6.39 (t,  $J$  = 4.8 Hz, 1H), 4.38 (t,  $J$  = 7.9 Hz, 2H), 3.11 (t,  $J$  = 7.9 Hz, 2H).

**$^{13}\text{C}$  NMR** (101 MHz, Chloroform-*d*)  $\delta$  158.81, 156.46, 143.57, 139.77, 134.55, 130.32, 129.63, 127.89, 127.10, 126.68, 124.71, 122.46, 112.12, 53.04, 29.41.

**IR** (KBr disk): 3032, 2919, 2854, 1577, 1556, 1444, 1421, 1206, 1175  $\text{cm}^{-1}$ .

**HRMS (ESI)** calcd for  $\text{C}_{18}\text{H}_{15}\text{BrN}_3^+$  [ $\text{M} + \text{H}$ ] $^+$  352.0444, found: 352.0448.

#### methyl 7-phenyl-1-(pyrimidin-2-yl)indoline-5-carboxylate (**4oa**)

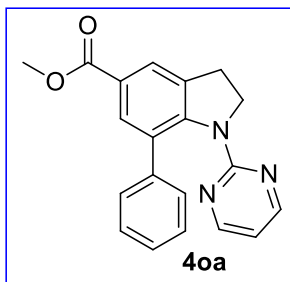

The product **4oa** was purified with silica gel chromatography (Petroleum ether /Ethyl Acetate = 7:1,  $R_f$  = 0.45) to give product as a yellow brown solid (65.9 mg, 66% yield).

**$^1\text{H}$  NMR** (400 MHz, Chloroform-*d*)  $\delta$  8.05 – 7.94 (m, 3H), 7.90 (s, 1H), 7.29 (d,  $J$  = 7.0 Hz, 2H), 7.13 (dt,  $J$  = 13.9, 7.0 Hz, 3H), 6.45 (t,  $J$  = 4.8 Hz, 1H), 4.48 (t,  $J$  = 8.1 Hz, 2H), 3.90 (s, 3H), 3.24 (t,  $J$  = 8.1 Hz, 2H).

**$^{13}\text{C}$  NMR** (101 MHz, Chloroform-*d*)  $\delta$  166.98, 158.62, 156.44, 145.25, 141.37, 134.99, 131.75, 129.08, 127.93, 126.55, 126.32, 124.90, 124.77, 112.65, 52.38, 51.92, 28.76.

**IR** (KBr disk): 3034, 2918, 2850, 1699, 1606, 1570, 1552, 1454, 1441, 1337, 1305, 1281, 1234, 1202, 1126  $\text{cm}^{-1}$ .

This compound is known. <sup>[4]</sup>

#### 2-methyl-7-phenyl-1-(pyrimidin-2-yl)indoline (**4pa**)

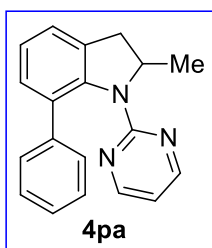

The product **4pa** was purified with silica gel chromatography (Petroleum ether /Ethyl Acetate = 6:1,  $R_f$  = 0.50) to give product as a yellowish solid (74.4 mg, 86% yield).

**$^1\text{H}$  NMR** (400 MHz, Chloroform-*d*)  $\delta$  7.93 (d,  $J$  = 4.8 Hz, 2H), 7.37 – 7.30 (m, 2H), 7.28 (d,  $J$  = 7.6 Hz, 1H), 7.22 (d,  $J$  = 7.7 Hz, 1H), 7.19 – 7.04 (m, 4H), 6.33 (t,  $J$  = 4.7 Hz, 1H), 4.91 (p,  $J$  = 6.7 Hz, 1H), 3.50 (dd,  $J$  = 15.5, 8.5 Hz, 1H), 2.63 (d,  $J$  = 15.5 Hz, 1H), 1.54 (d,  $J$  = 6.5 Hz, 3H).

**$^{13}\text{C}$  NMR** (101 MHz, Chloroform-*d*)  $\delta$  158.63, 156.40, 142.28, 139.45, 133.68, 130.64, 128.78, 127.81, 126.42, 125.88, 124.04, 123.70, 111.68, 59.43, 36.74, 21.09.

**IR** (KBr disk): 3027, 2969, 2856, 1577, 1548, 1463, 1436, 1280, 1211, 1117  $\text{cm}^{-1}$ .

This compound is known. <sup>[4]</sup>

### 3-methyl-7-phenyl-1-(pyrimidin-2-yl)indoline (4qa)

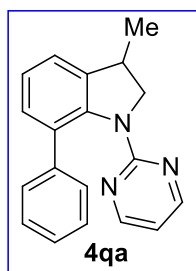

The product **4qa** was purified with silica gel chromatography (Petroleum ether /Ethyl Acetate = 10:1,  $R_f$  = 0.40) to give product as a yellow solid (77.6 mg, 90% yield).

**$^1\text{H}$  NMR** (400 MHz, Chloroform-*d*)  $\delta$  7.94 (d,  $J$  = 4.8 Hz, 2H), 7.38 – 7.32 (m, 2H), 7.30 – 7.26 (m, 1H), 7.22 – 7.18 (m, 1H), 7.17 – 7.11 (m, 3H), 7.10 – 7.05 (m, 1H), 6.35 (t,  $J$  = 4.8 Hz, 1H), 4.61 (dd,  $J$  = 10.8, 8.2 Hz, 1H), 3.98 (dd,  $J$  = 10.8, 7.0 Hz, 1H), 3.48 (h,  $J$  = 7.0 Hz, 1H), 1.35 (d,  $J$  = 6.9 Hz, 3H).

**$^{13}\text{C}$  NMR** (101 MHz, Chloroform-*d*)  $\delta$  159.16, 156.44, 142.05, 140.57, 140.02, 130.16, 128.95, 127.80, 126.59, 125.94, 123.86, 122.34, 111.64, 59.91, 36.10, 18.94.

**IR** (KBr disk): 3030, 2959, 2870, 1737, 1575, 1441, 1241, 1132, 1047  $\text{cm}^{-1}$ .

This compound is known.<sup>[4]</sup>

### 8-phenyl-1-(pyrimidin-2-yl)-1,2,3,4-tetrahydroquinoline (6)

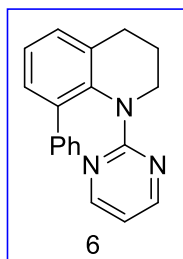

The product **6** was purified with silica gel chromatography (Petroleum ether /Ethyl Acetate = 15:1,  $R_f$  = 0.45) to give product as a yellow solid (41.4 mg, 48% yield).

**$^1\text{H}$  NMR** (400 MHz, Chloroform-*d*)  $\delta$  7.98 (d,  $J$  = 3.9 Hz, 2H), 7.32 – 7.26 (m, 2H), 7.25 – 7.22 (m, 1H), 7.21 – 7.16 (m, 2H), 7.13 (t,  $J$  = 7.6 Hz, 2H), 7.06 – 7.00 (m, 1H), 6.24 (t,  $J$  = 4.8 Hz, 1H), 4.08 (s, 2H), 2.77 (t,  $J$  = 6.6 Hz, 2H), 2.18 – 2.04 (m, 2H).

**$^{13}\text{C}$  NMR** (101 MHz, Chloroform-*d*)  $\delta$  160.22, 156.95, 141.11, 137.49, 137.26, 135.42, 128.40, 127.92, 127.69, 127.31, 126.19, 125.05, 110.92, 45.07, 27.28, 25.10.

This compound is known.<sup>[5]</sup>



### 7-phenyl-1-(pyrimidin-2-yl)-1H-indole (7a)

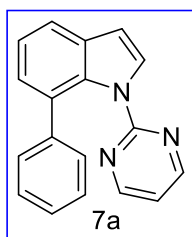

The product **7a** was purified with silica gel chromatography (Petroleum ether /Ethyl Acetate = 4:1,  $R_f$  = 0.45) to give product as a yellowish liquid (49.3 mg, 91% yield).

**$^1\text{H}$  NMR** (400 MHz, Chloroform-*d*)  $\delta$  8.16 (d,  $J$  = 4.8 Hz, 2H), 7.79 (d,  $J$  = 3.5 Hz, 1H), 7.65 (dd,  $J$  = 6.7, 2.2 Hz, 1H), 7.34 – 7.27 (m, 2H), 7.21 (dd,  $J$  = 6.6, 2.9 Hz, 2H), 7.08 (dd,  $J$  = 5.0, 1.7 Hz, 3H), 6.83 – 6.69 (m, 2H).

**$^{13}\text{C}$  NMR** (101 MHz, Chloroform-*d*)  $\delta$  156.99, 156.87, 142.05, 132.73, 132.00, 129.22, 128.51, 127.71, 127.48, 125.86, 125.57, 122.09, 120.16, 116.63, 106.32.

This compound is known.<sup>[4]</sup>

### 7-phenyl-1H-indole (7b)

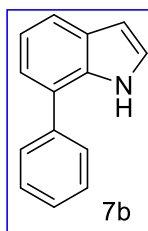

The product **7b** was purified with silica gel chromatography (Petroleum ether /Ethyl Acetate = 10:1,  $R_f$  = 0.41) to give product as a brown liquid (32.1 mg, 83% overall yield).

**$^1\text{H}$  NMR** (400 MHz, Chloroform-*d*)  $\delta$  8.37 (s, 1H), 7.66 – 7.59 (m, 3H), 7.52 – 7.46 (m, 2H), 7.42 – 7.36 (m, 1H), 7.22 – 7.19 (m, 2H), 7.18 – 7.16 (m, 1H), 6.61 (dd,  $J$  = 3.2, 2.1 Hz, 1H).

**$^{13}\text{C}$  NMR** (101 MHz, Chloroform-*d*)  $\delta$  139.25, 133.68, 129.10, 128.24, 128.21, 127.37, 125.57, 124.31, 121.86, 120.27, 120.01, 103.03.

This compound is known.<sup>[4]</sup>

## IV. References

- (1) A. T. Vu, S. T. Cohn, P. Zhang, C. Y. Kim, P. E. Mahaney, J. A. Bray, G. H. Johnston, E. J. Koury, S. A. Cosmi, D. C. Deecher, V. A. Smith, J.E. Harrison, L. Leventhal, G. T. Whiteside, J. D. Kennedy, and E. J. Trybulski, *J. Med. Chem.*, 2010, **53**, 2051.
- (2) Ackermann, L.; Lygin, A. V. *Org. Lett.* , 2011, **13**, 3332.
- (3) A. S. Manoso, C. Ahn, A. Soheili, C. J. Handy, R. Correia, W. M. Seganish and P. DeShong, *J. Org. Chem.* 2004, **69**, 8305.
- (4) P. B. De, S. Pradhan, S. Banerjee and T. Punniyamurthy, *Chem. Commun.*, 2018, **54**, 2494.
- (5) C. Chen, Y. Pan, H. Zhao, X. Xu, Z. Luo, L. Cao, S. Xi, H. Li and L. Xu, *Org. Lett.*, 2018, **20**, 6799.

## V. NMR Spectra

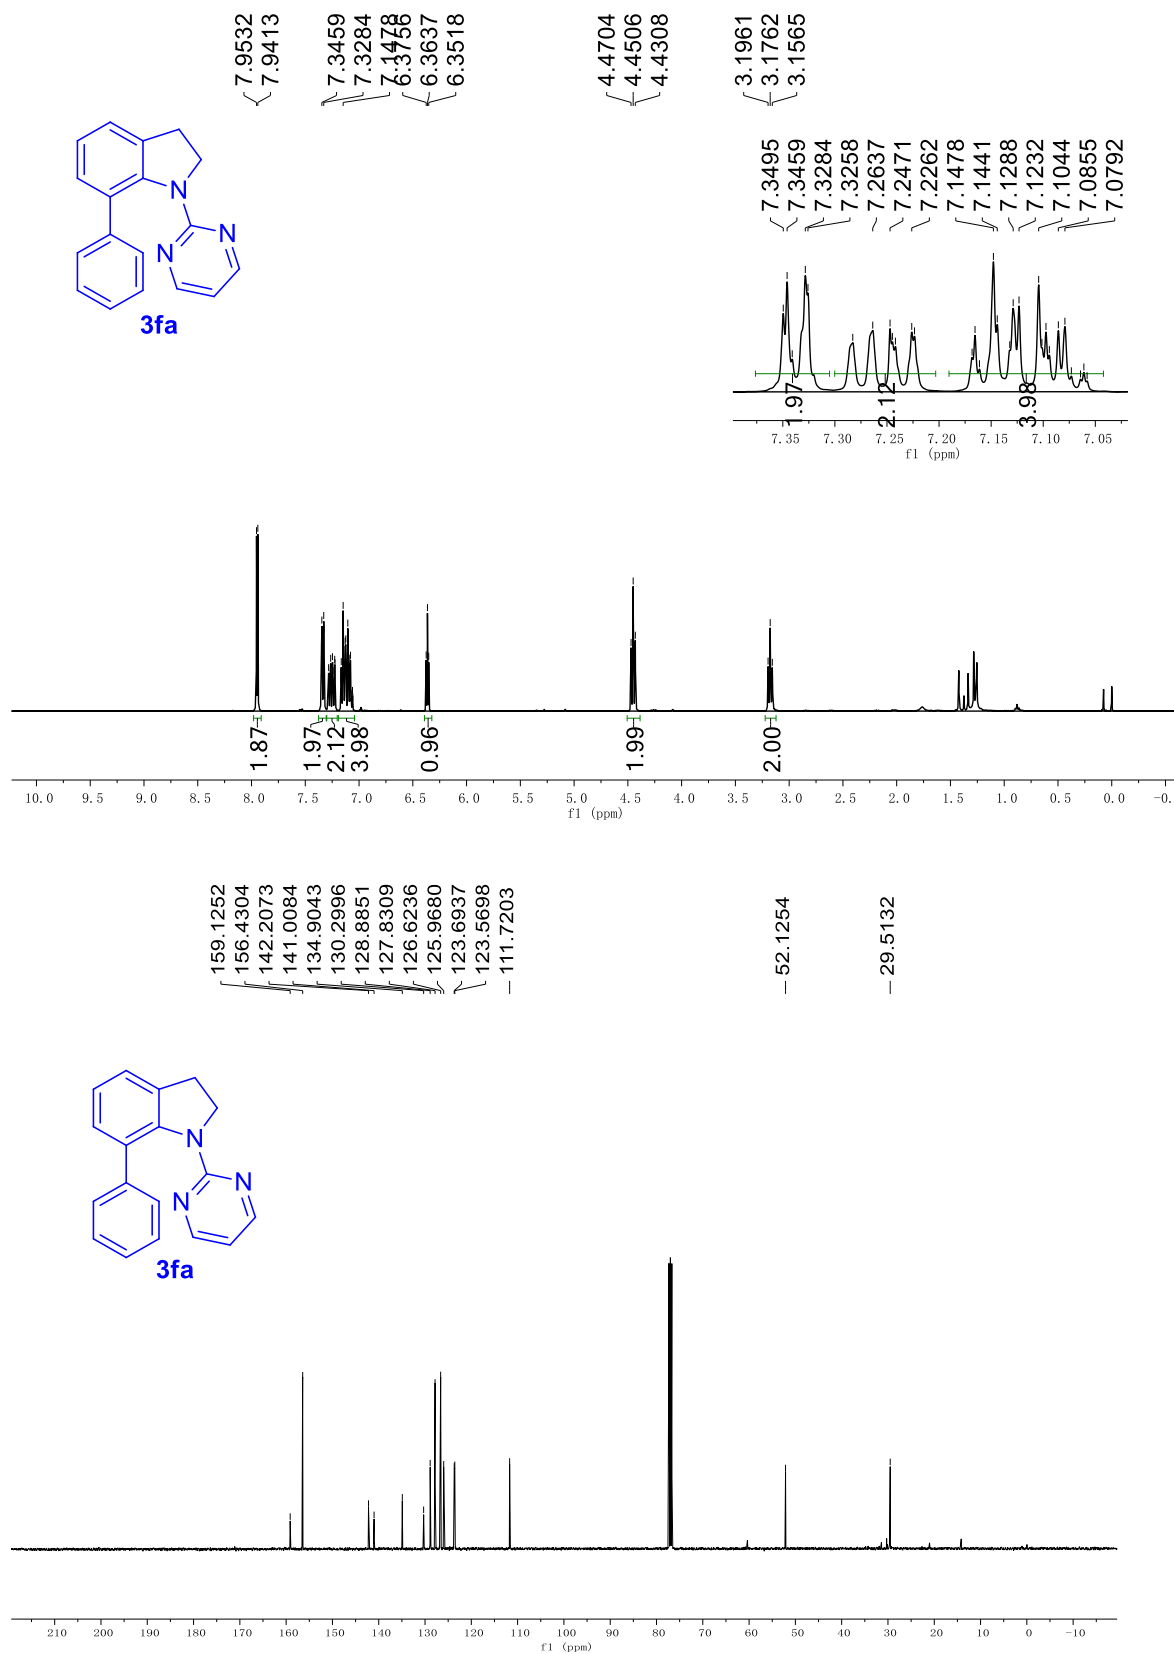

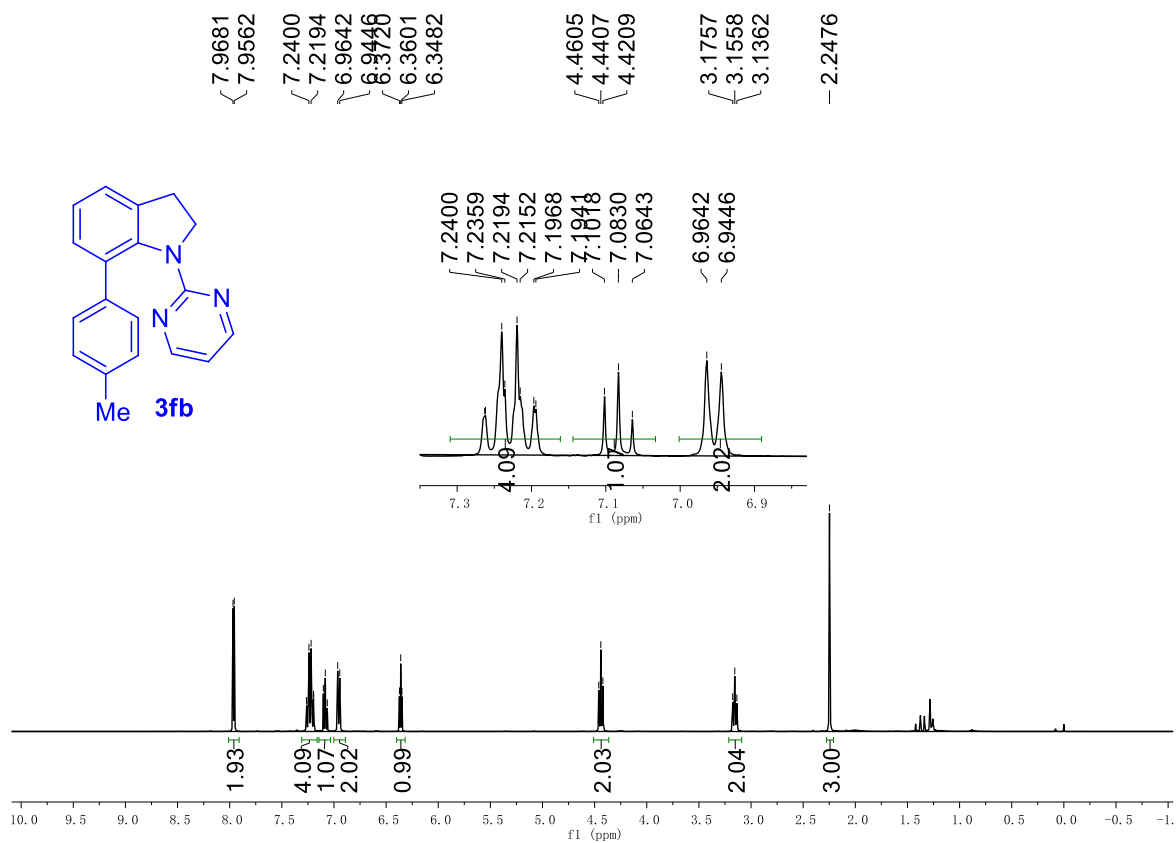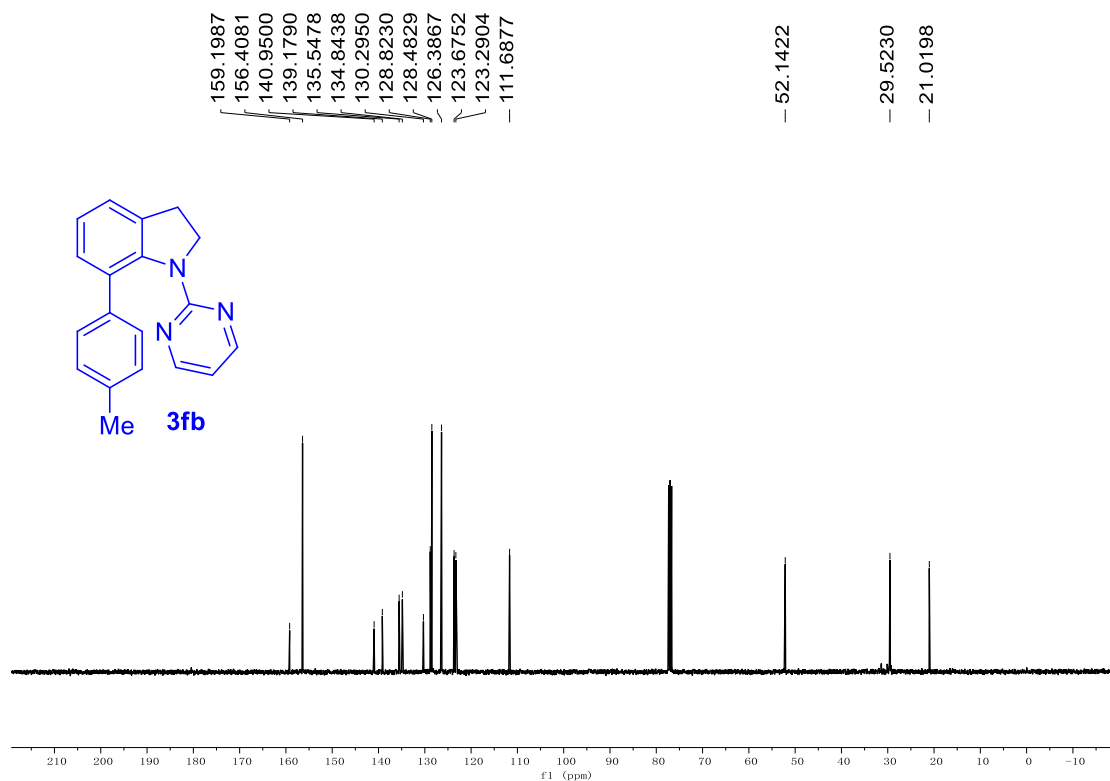

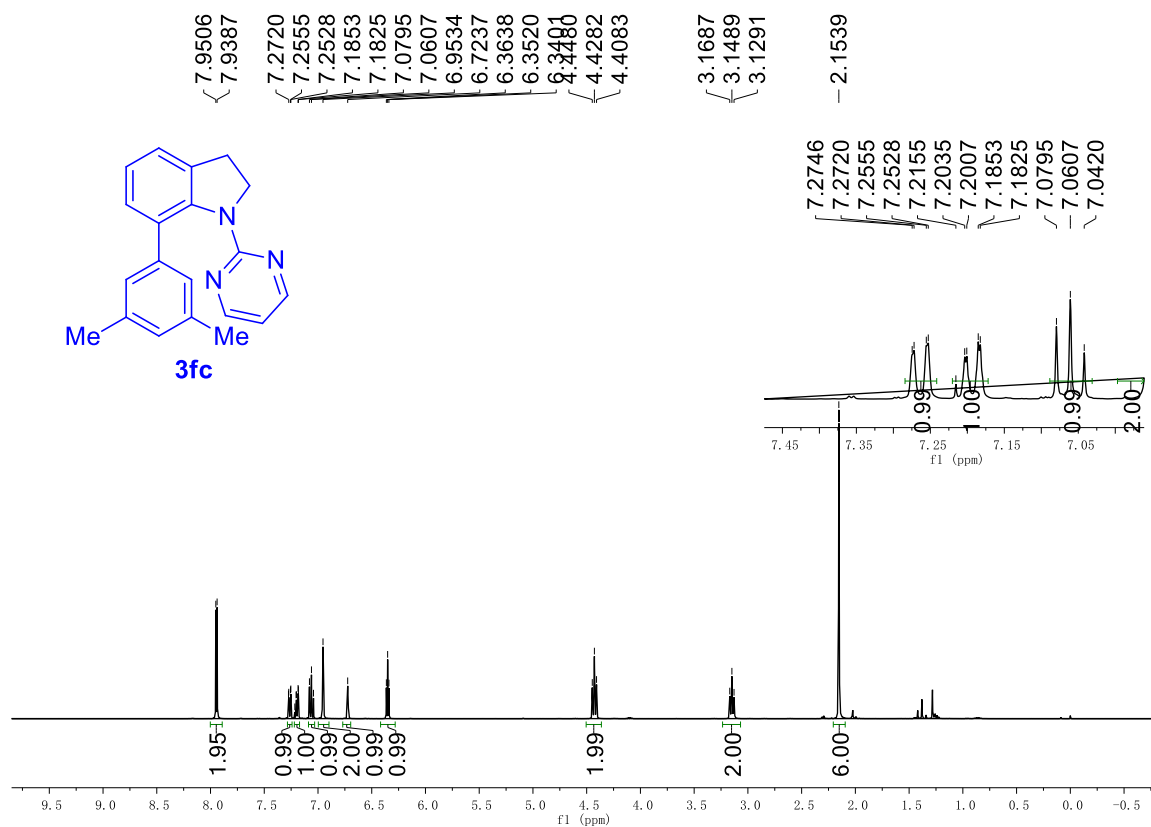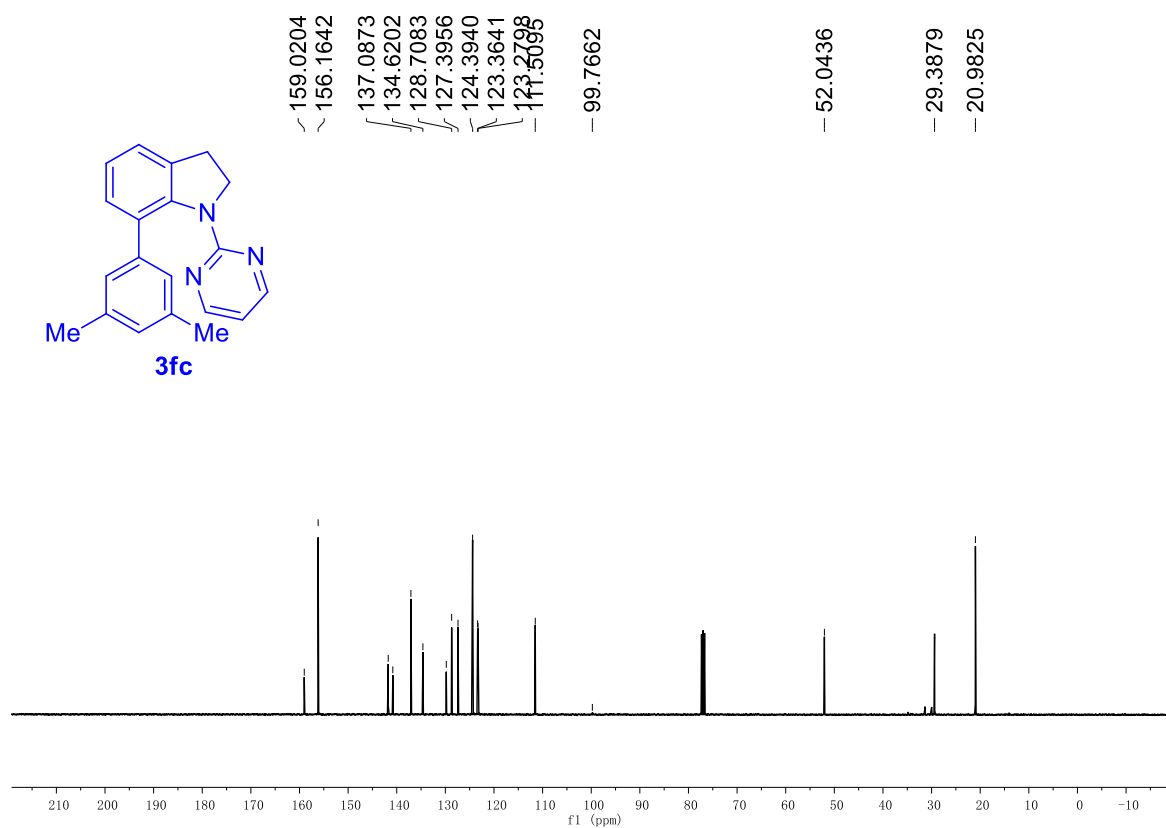

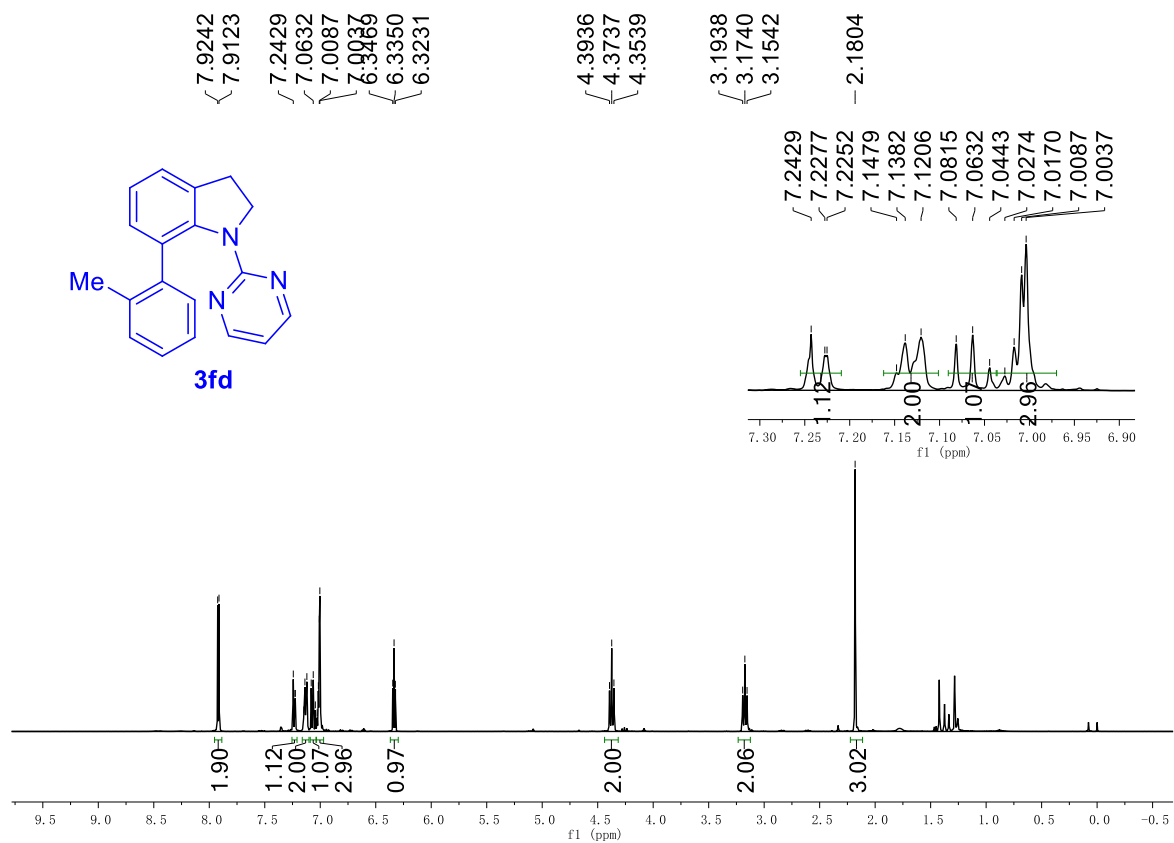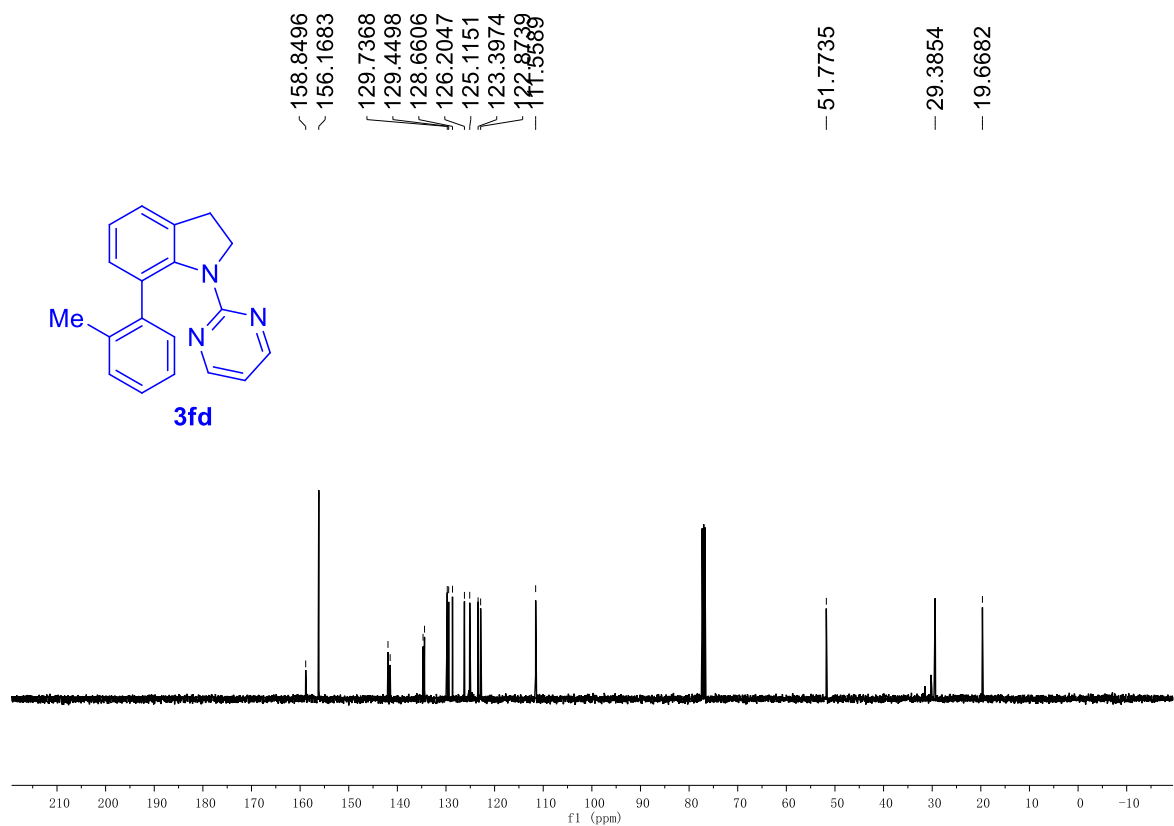

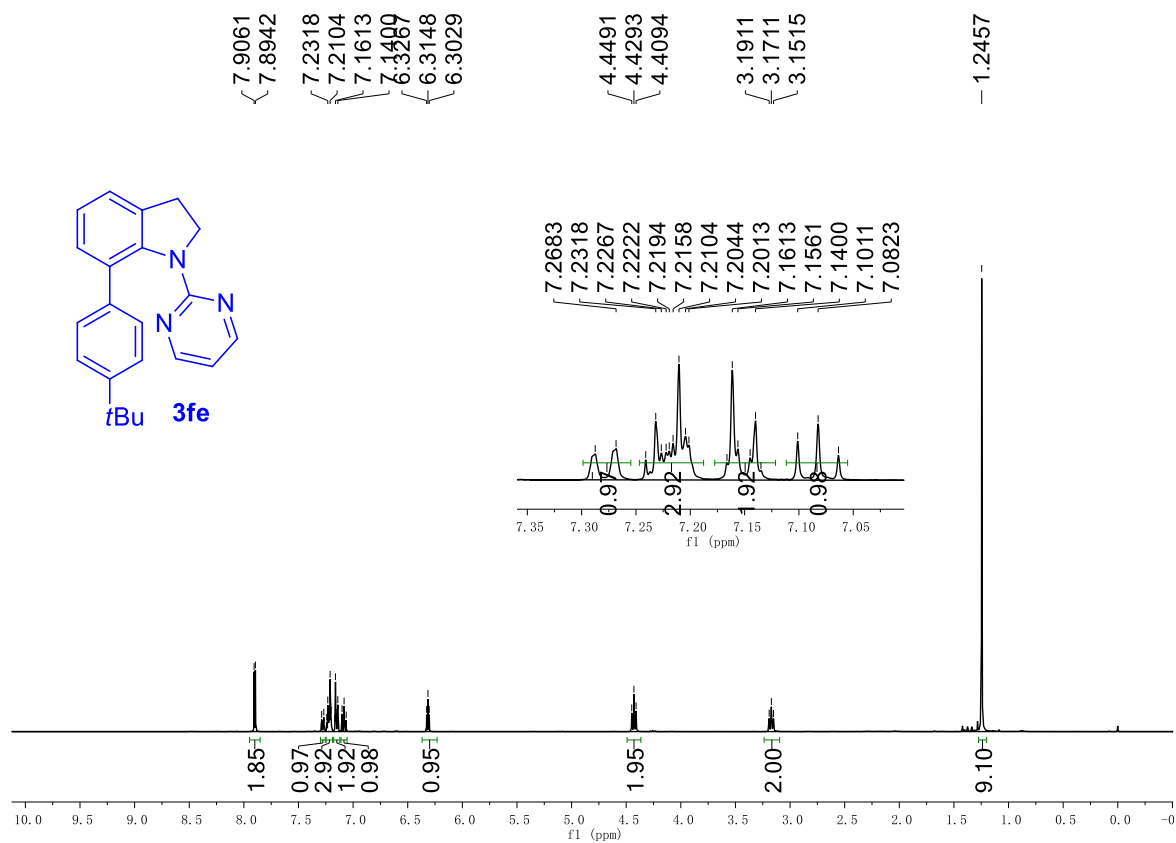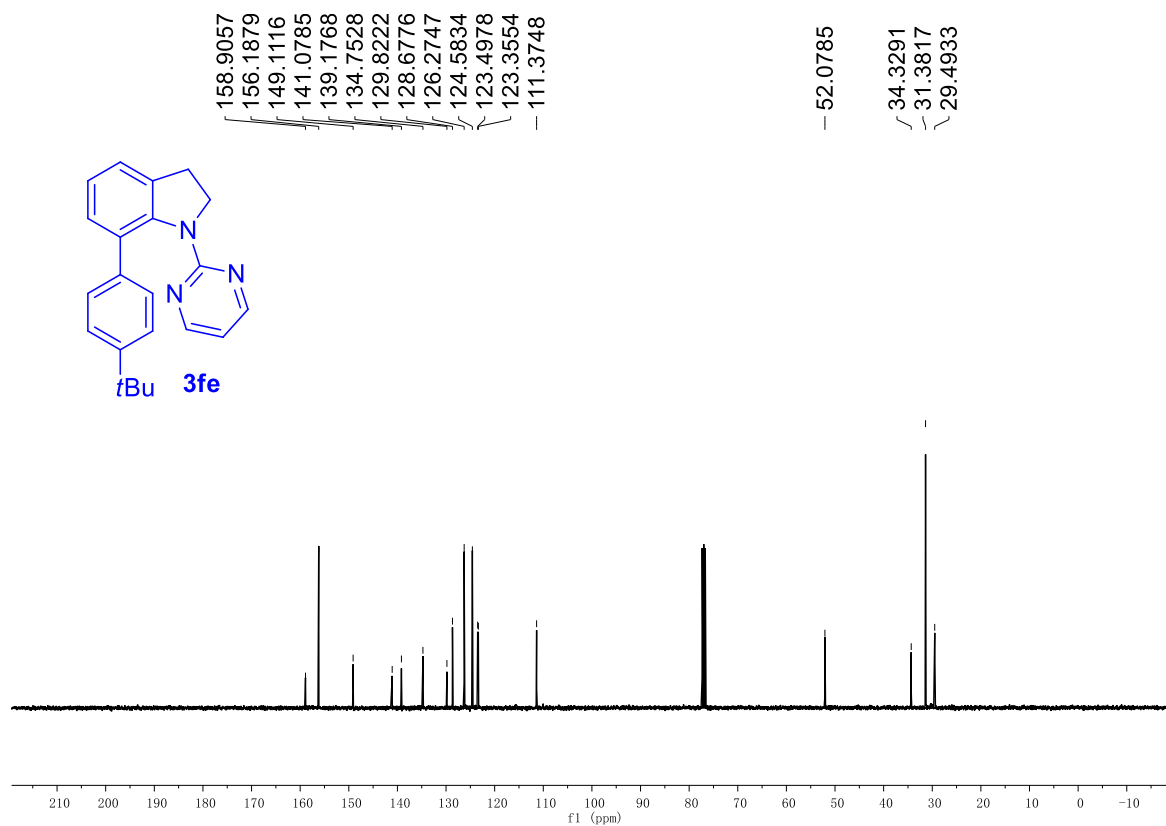

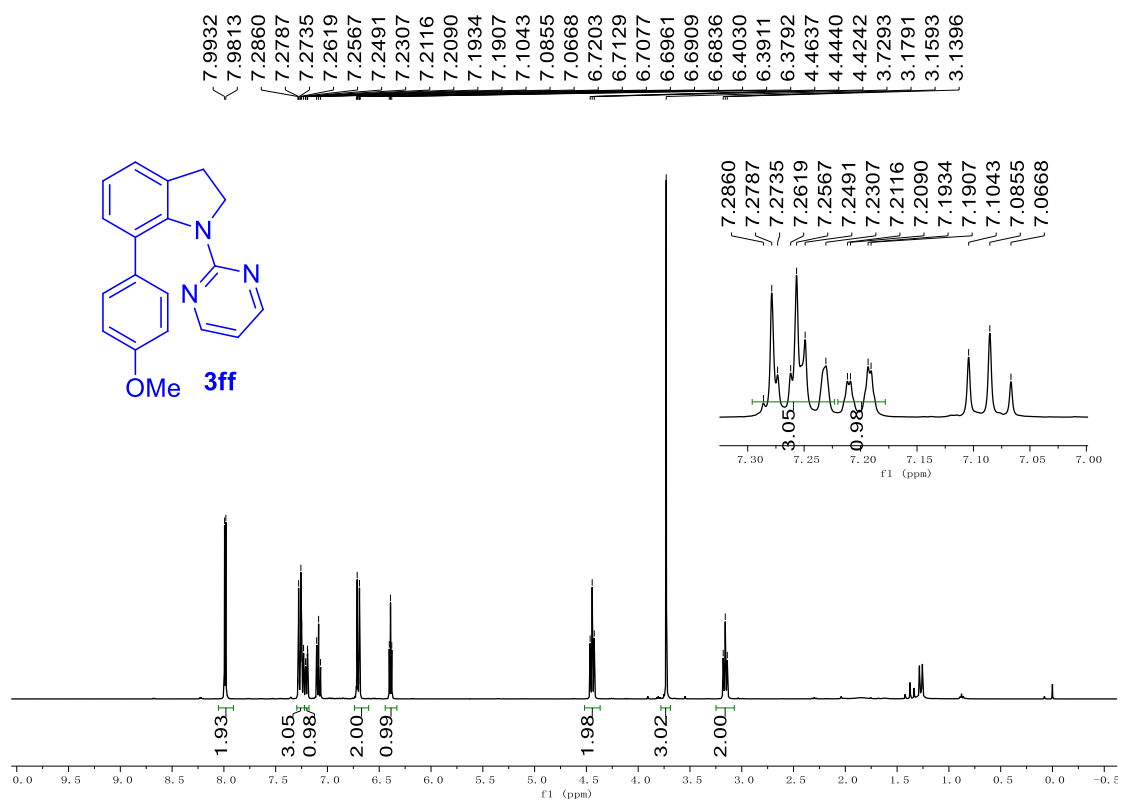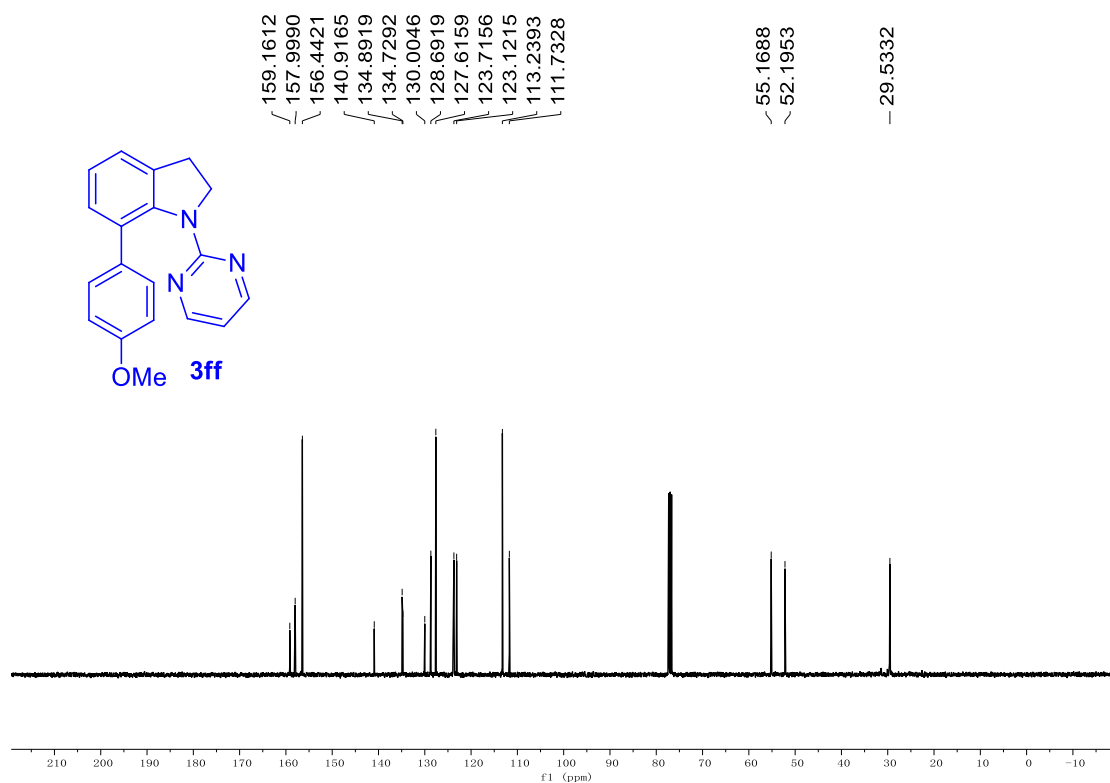



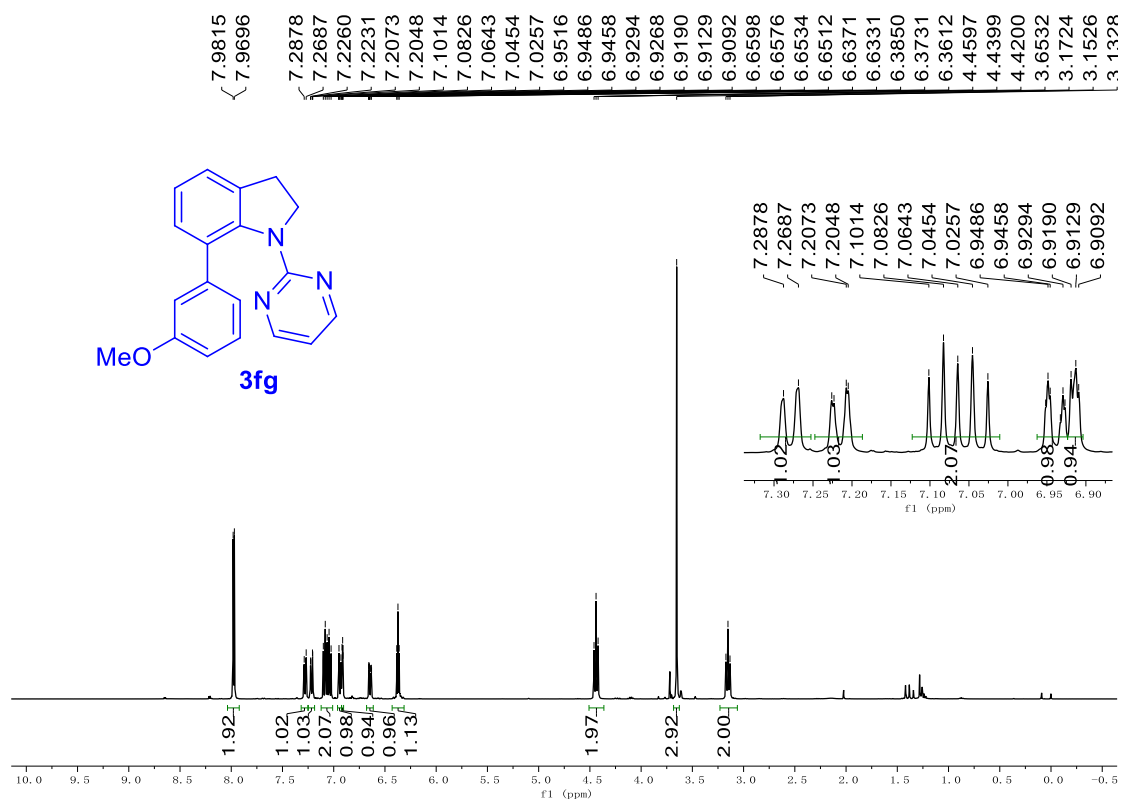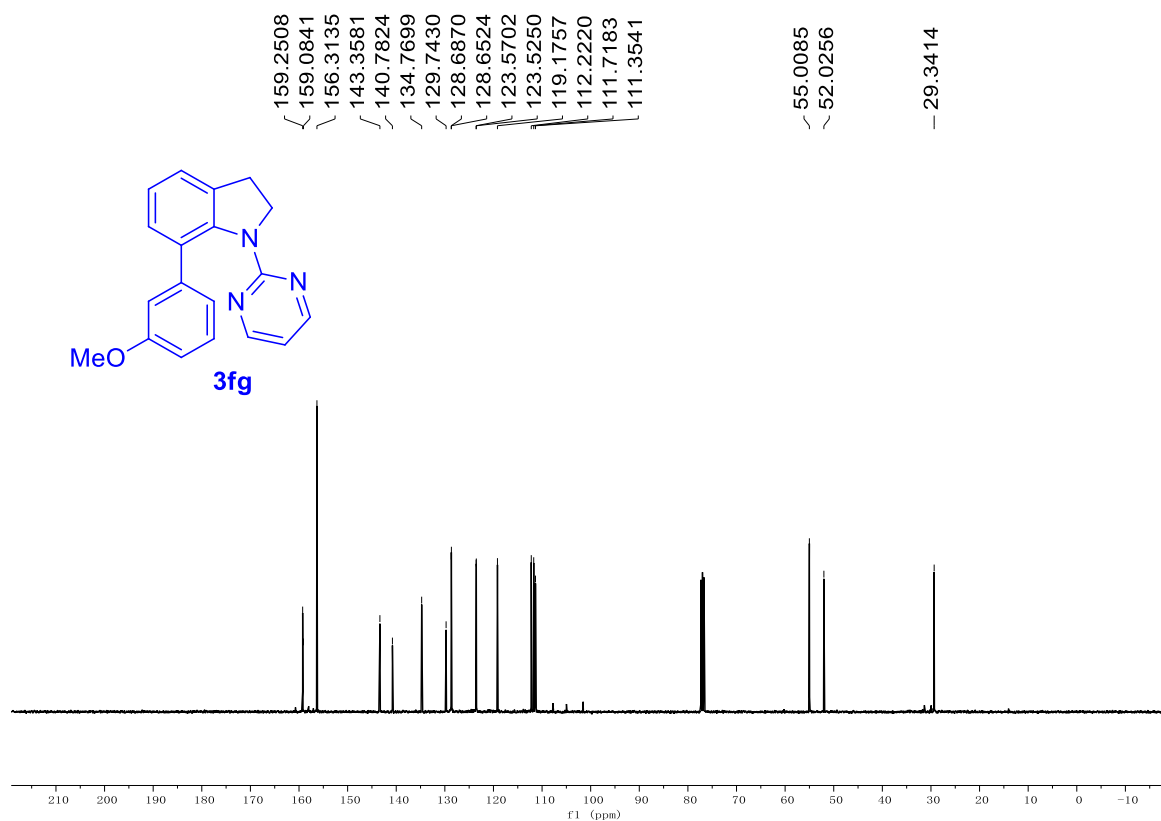

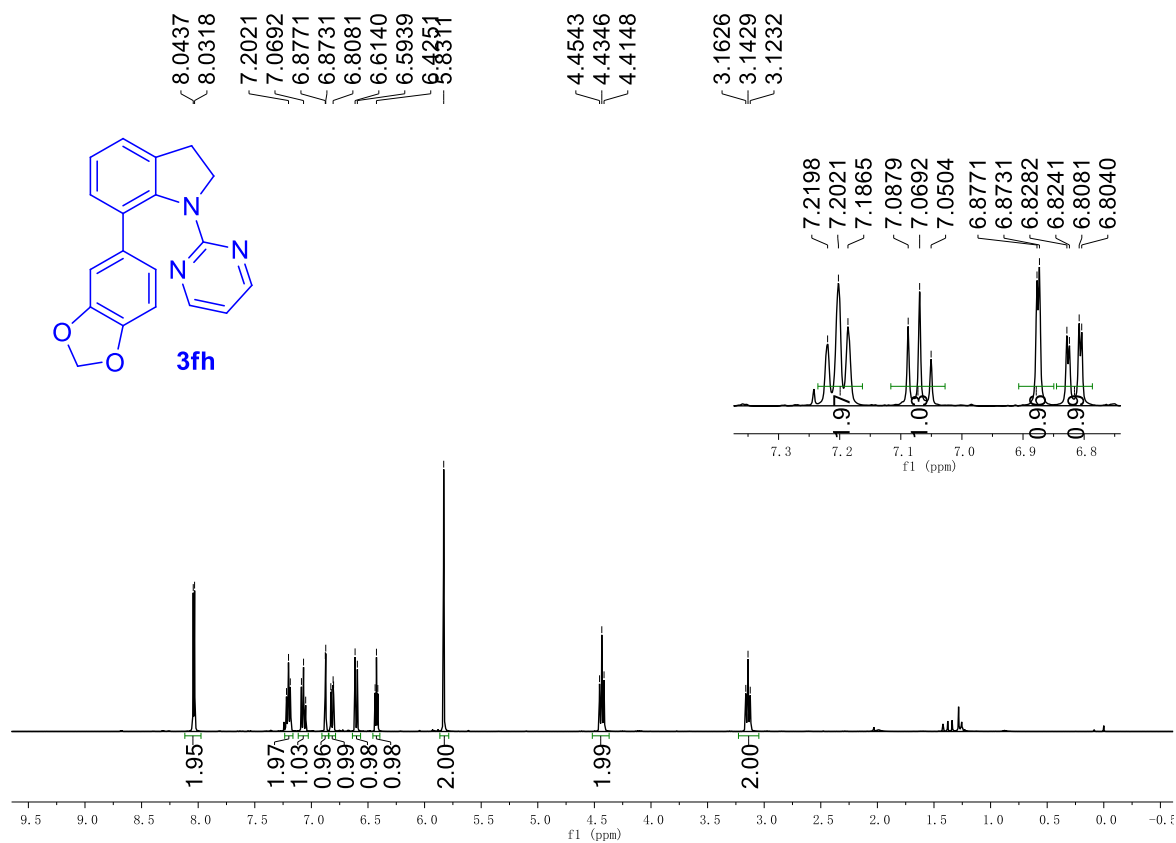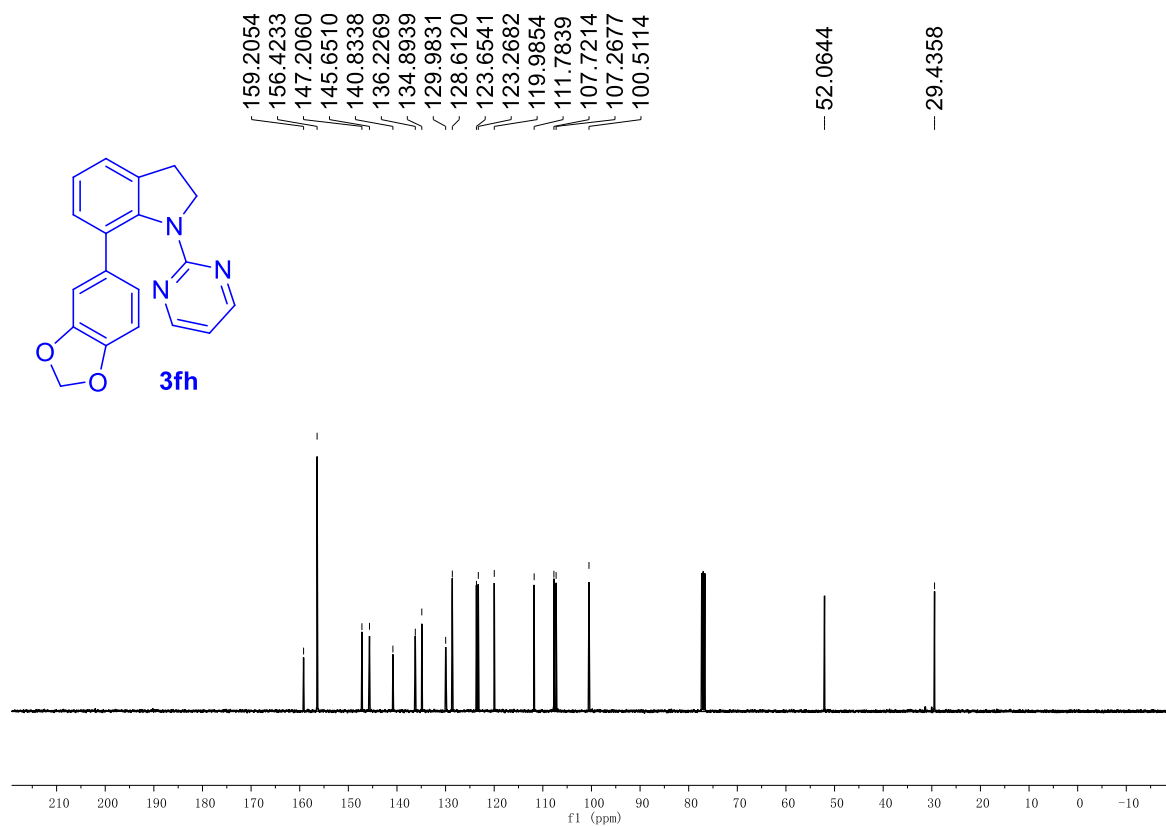

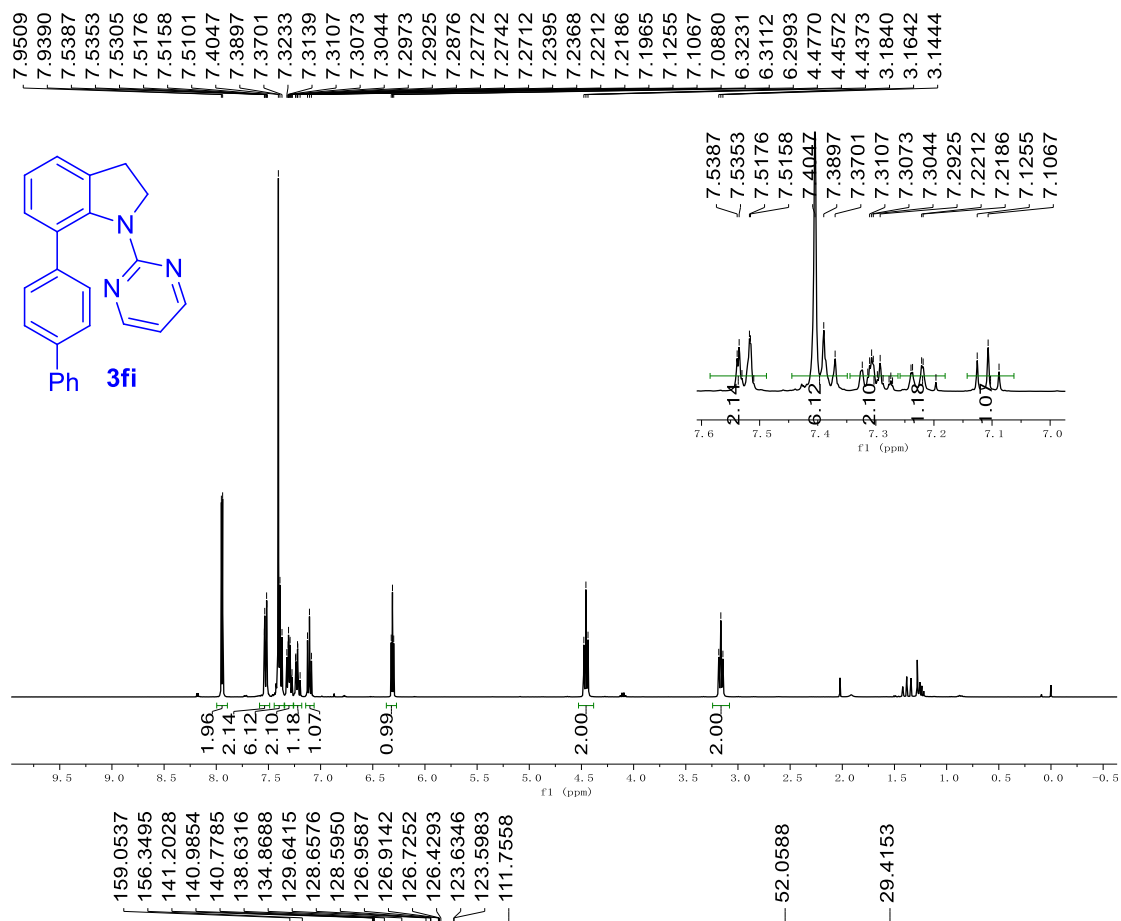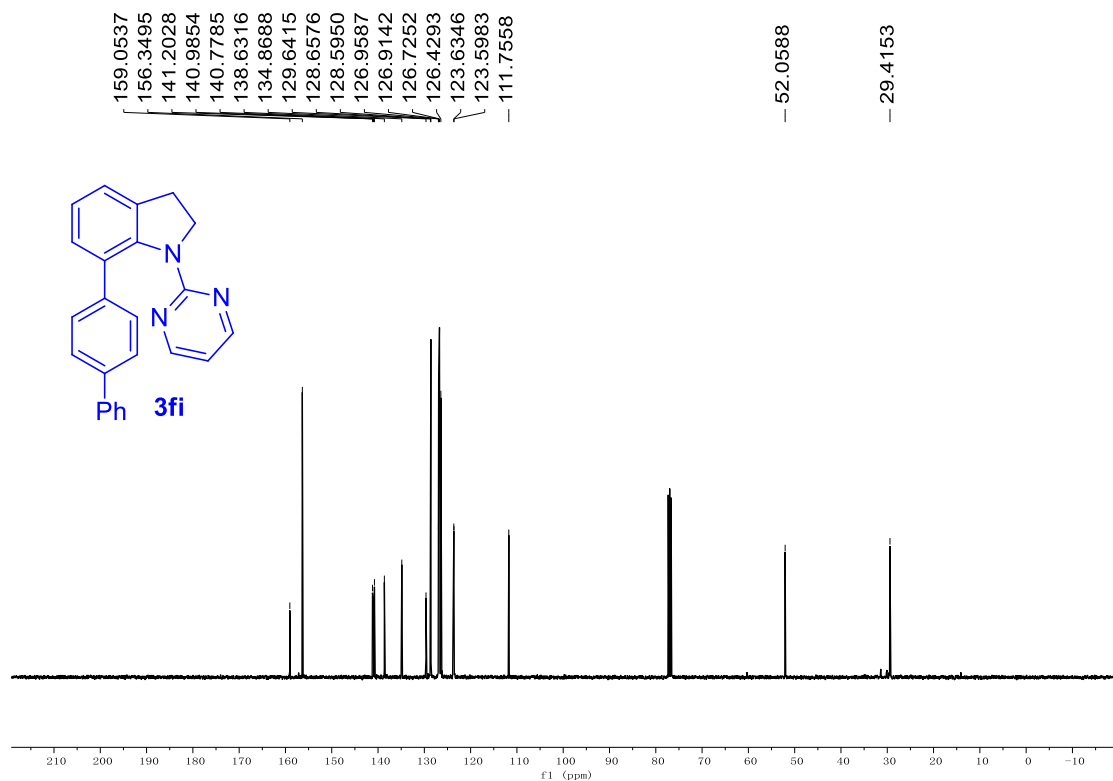

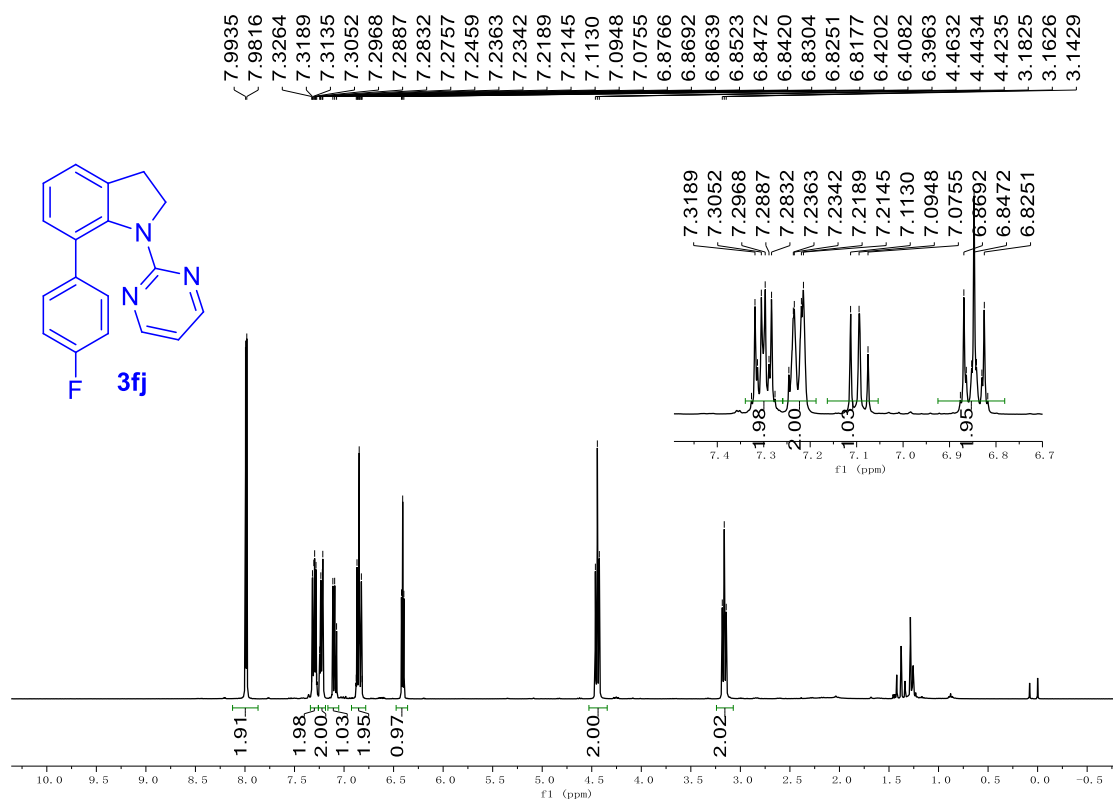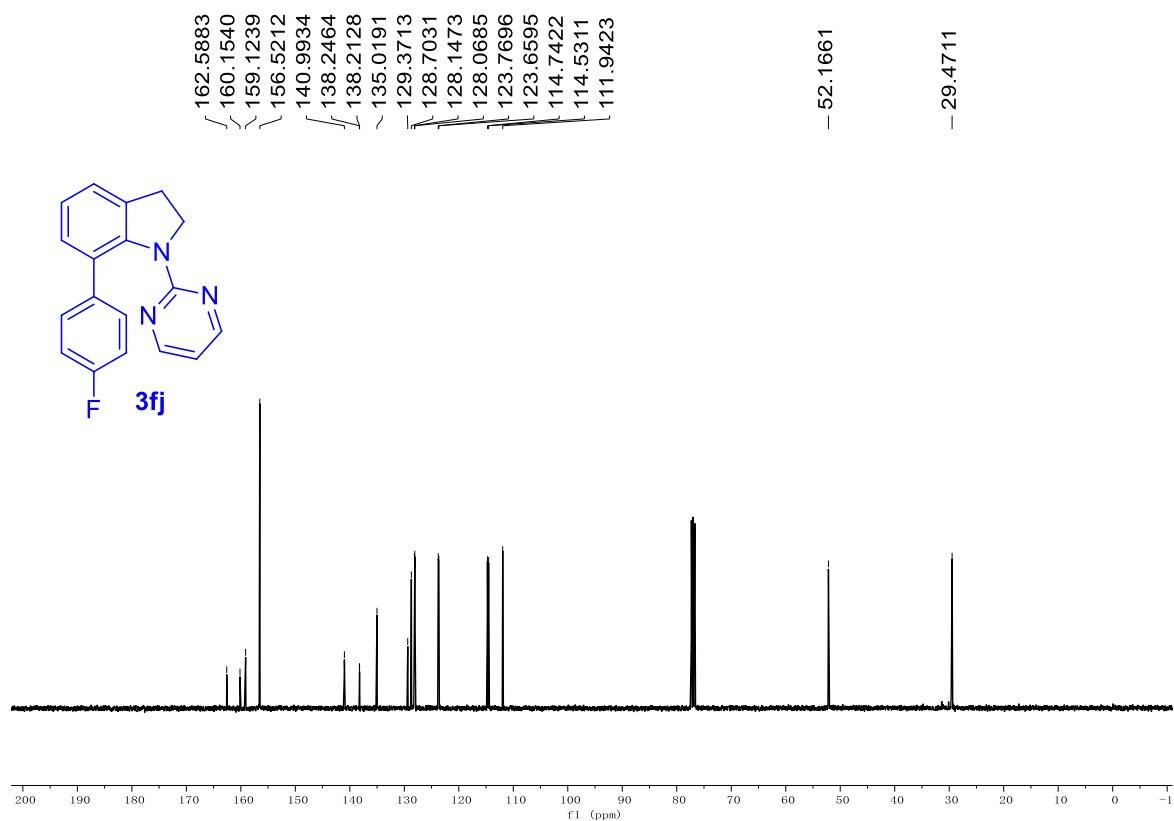

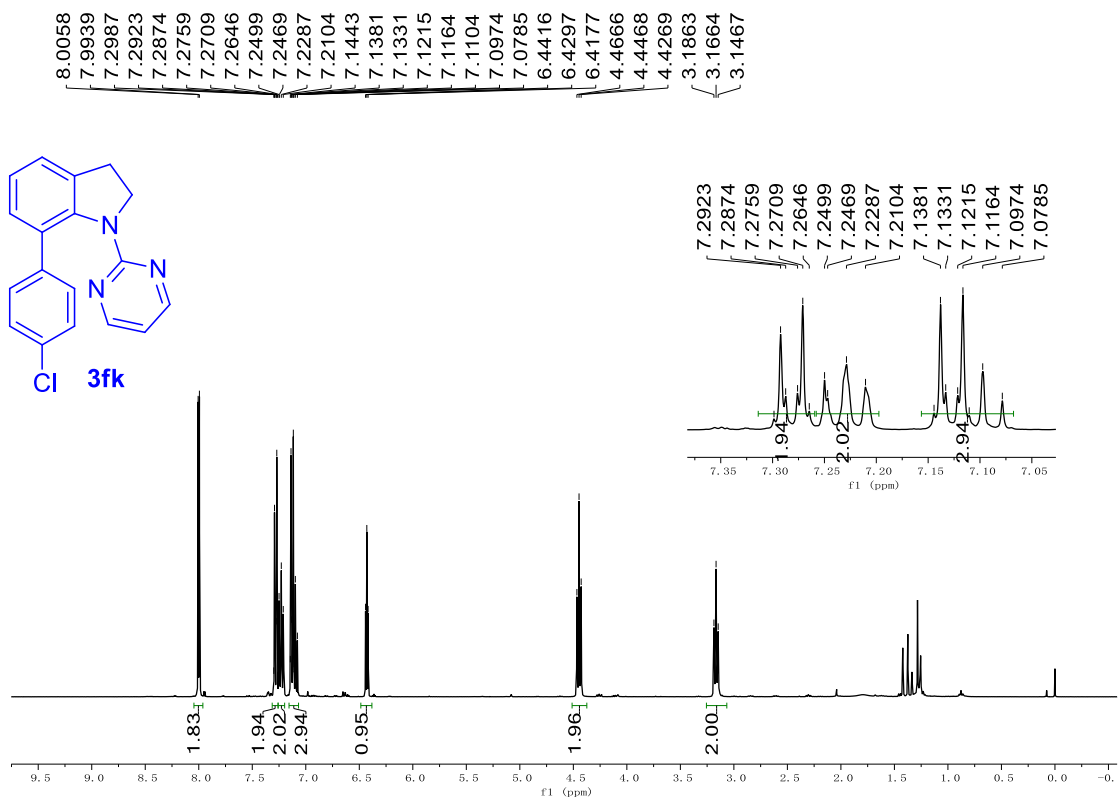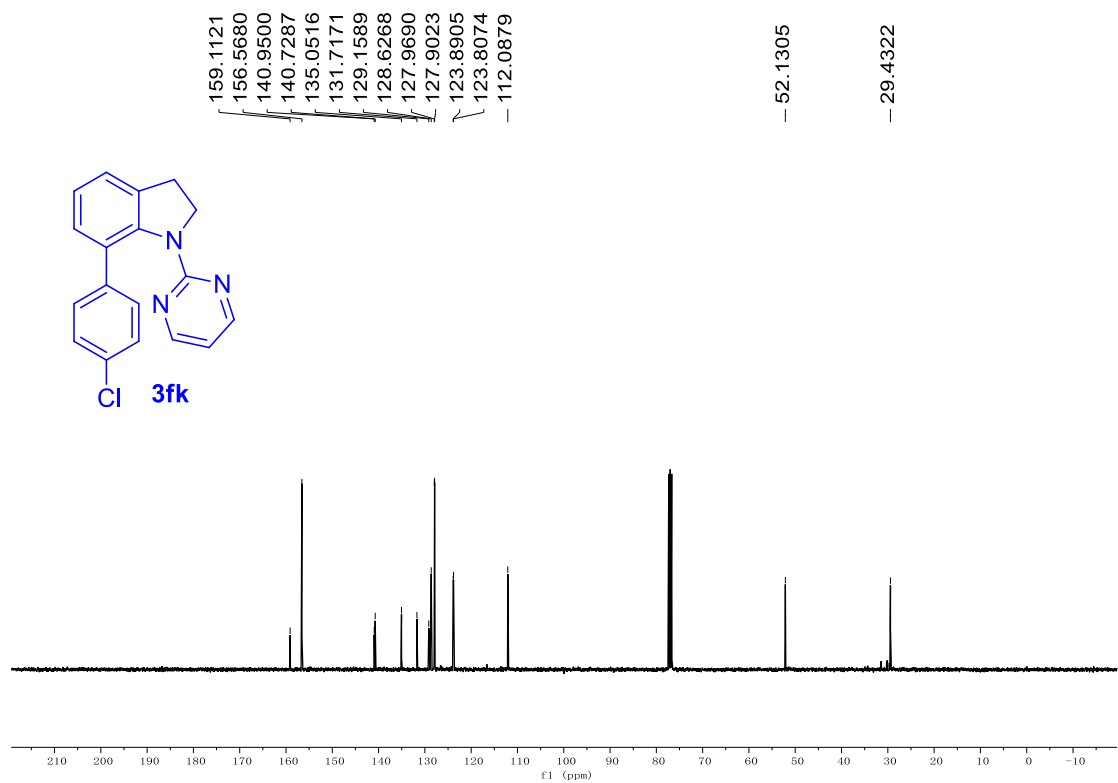

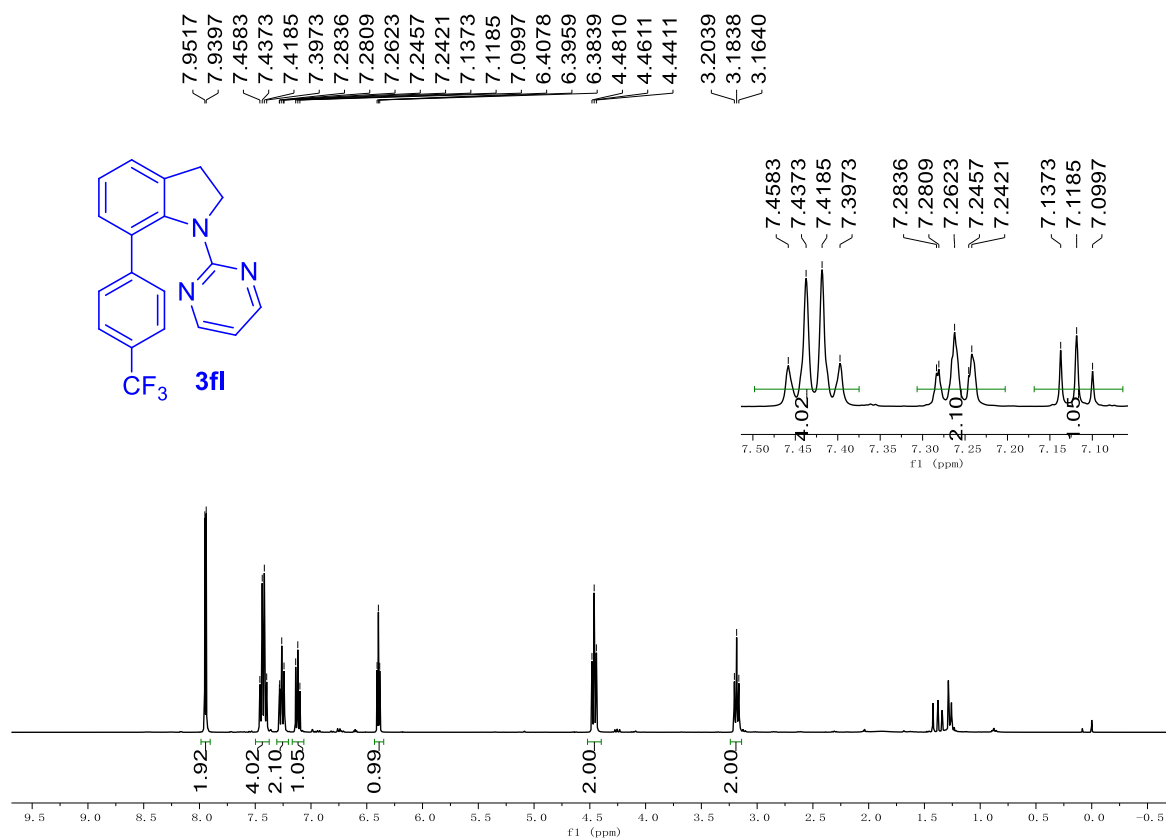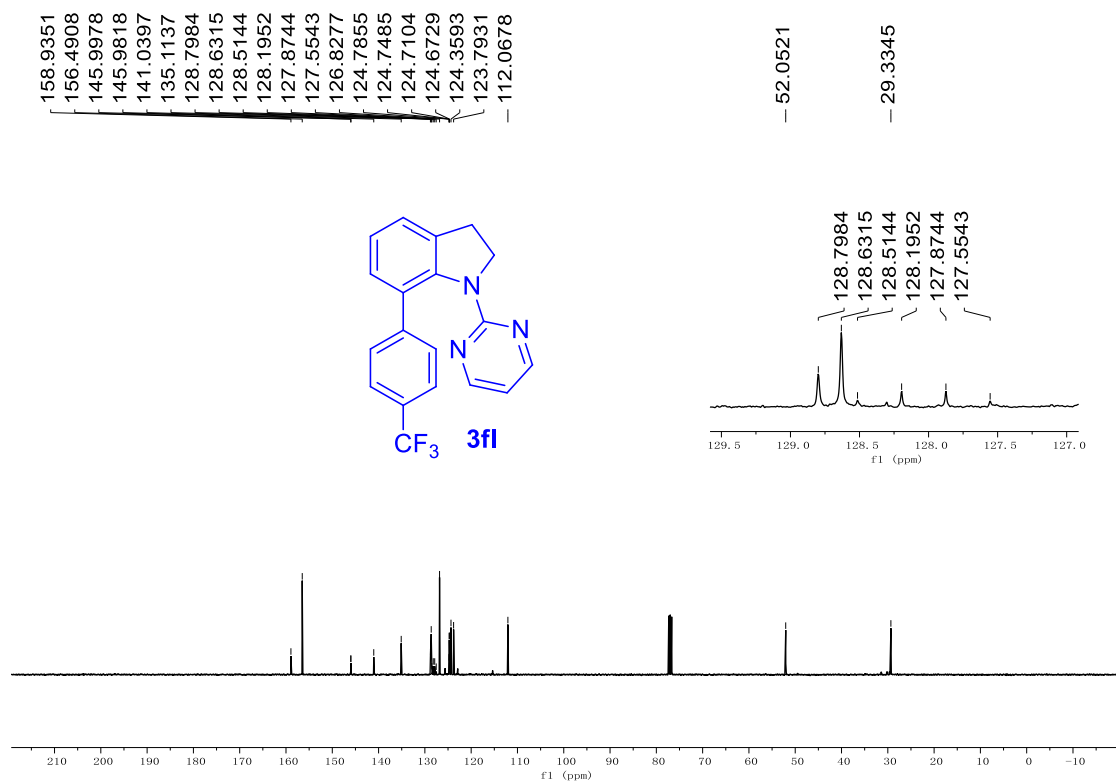

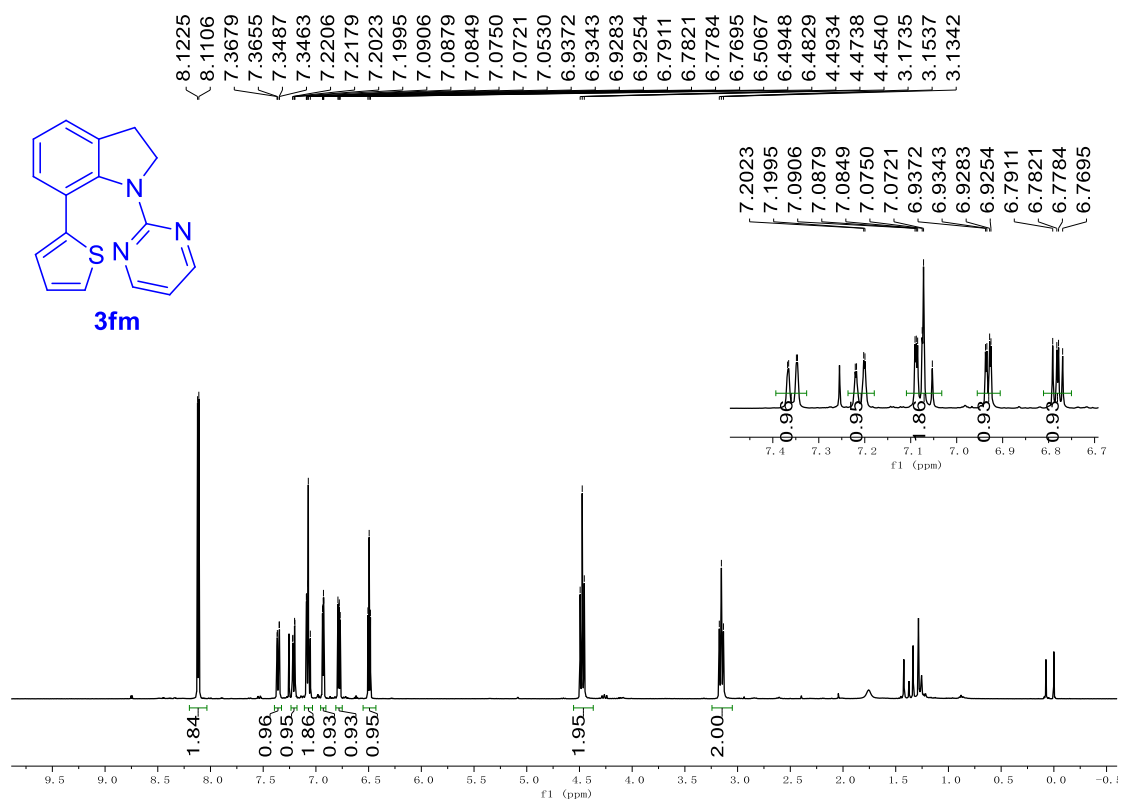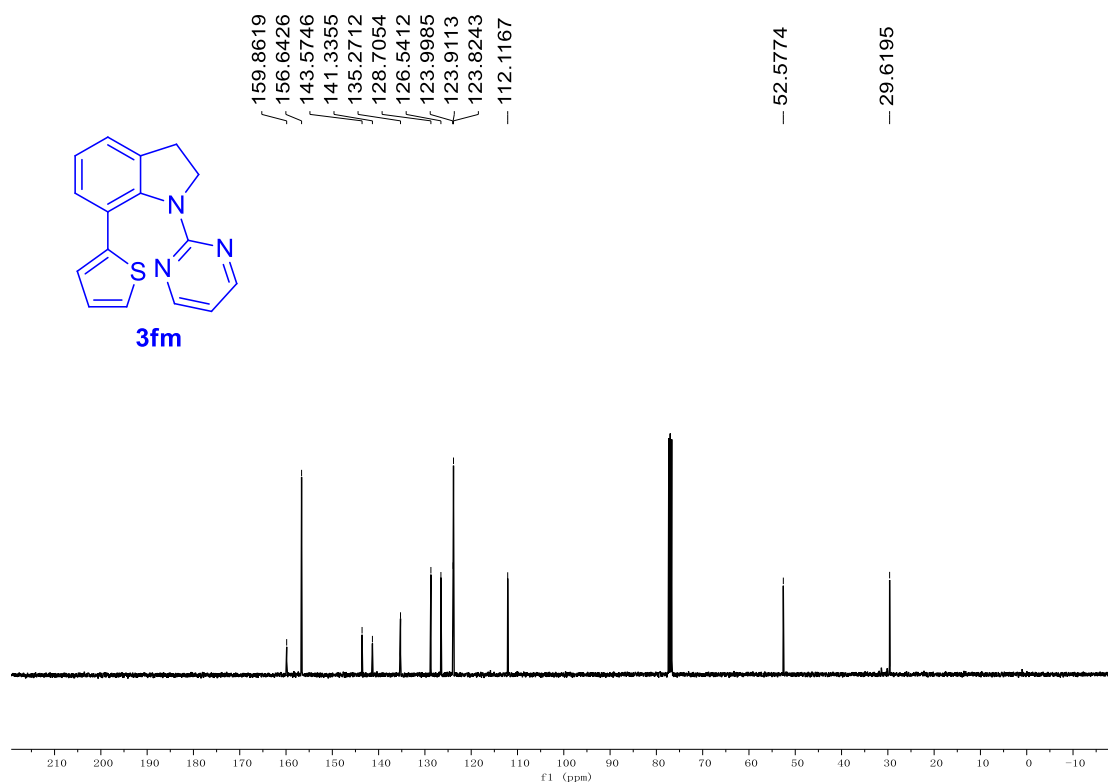

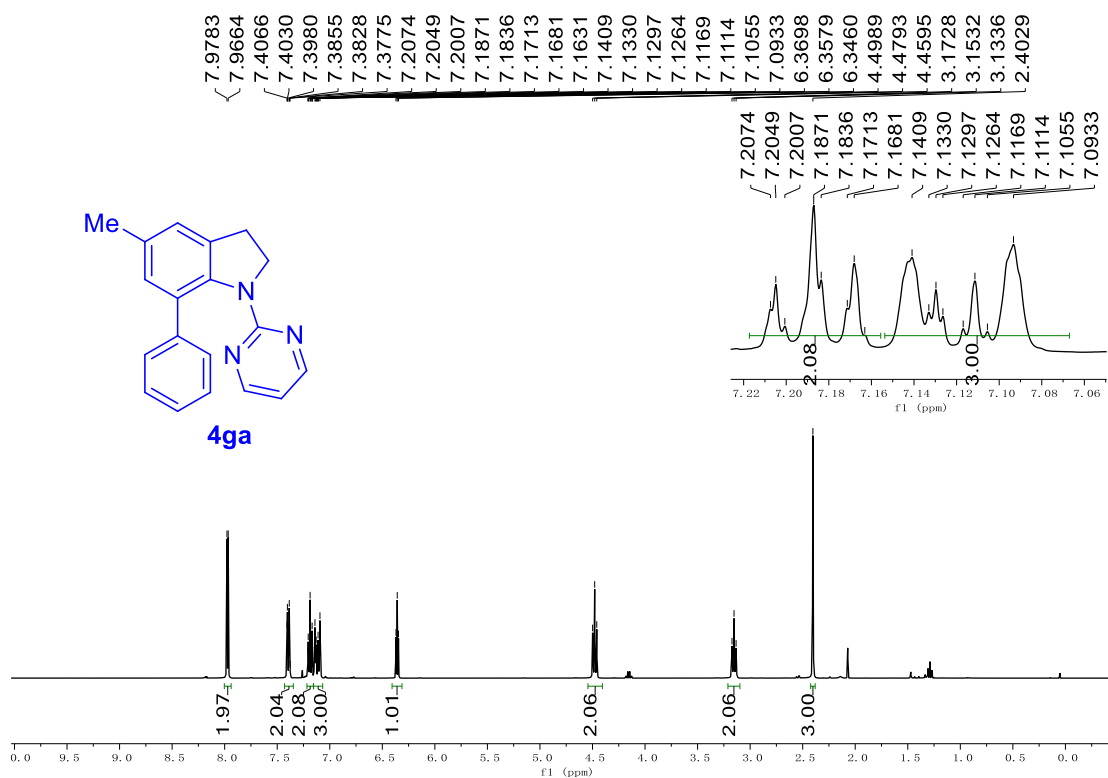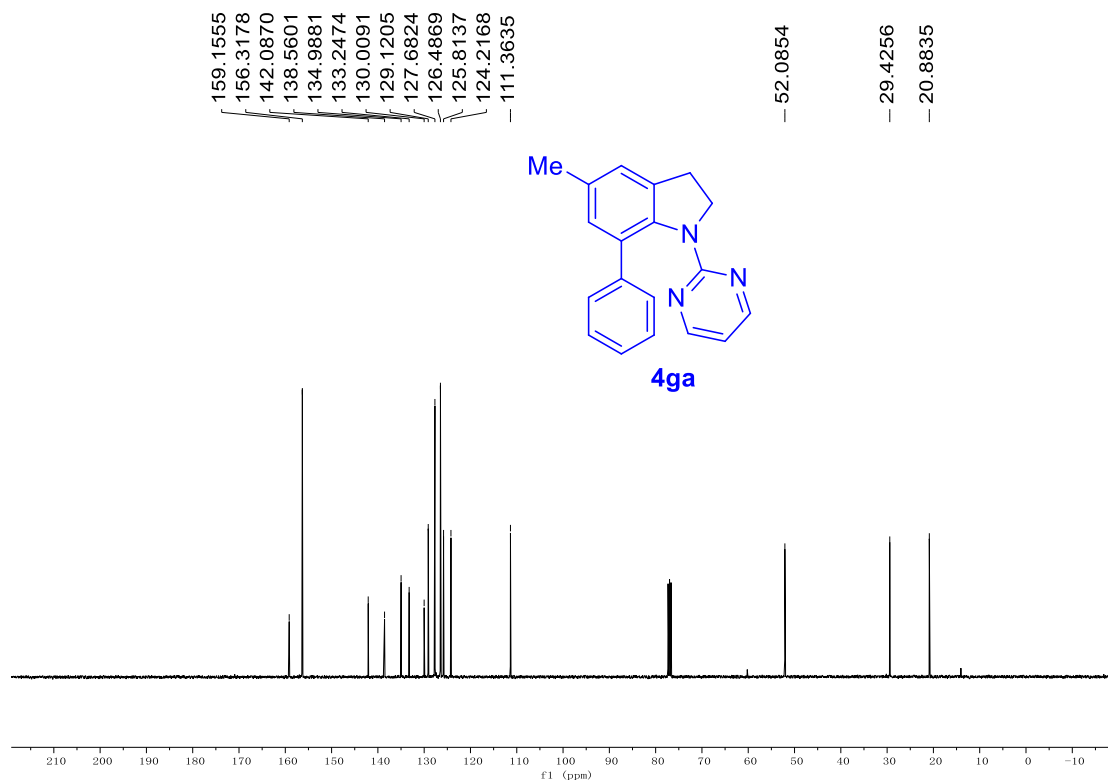



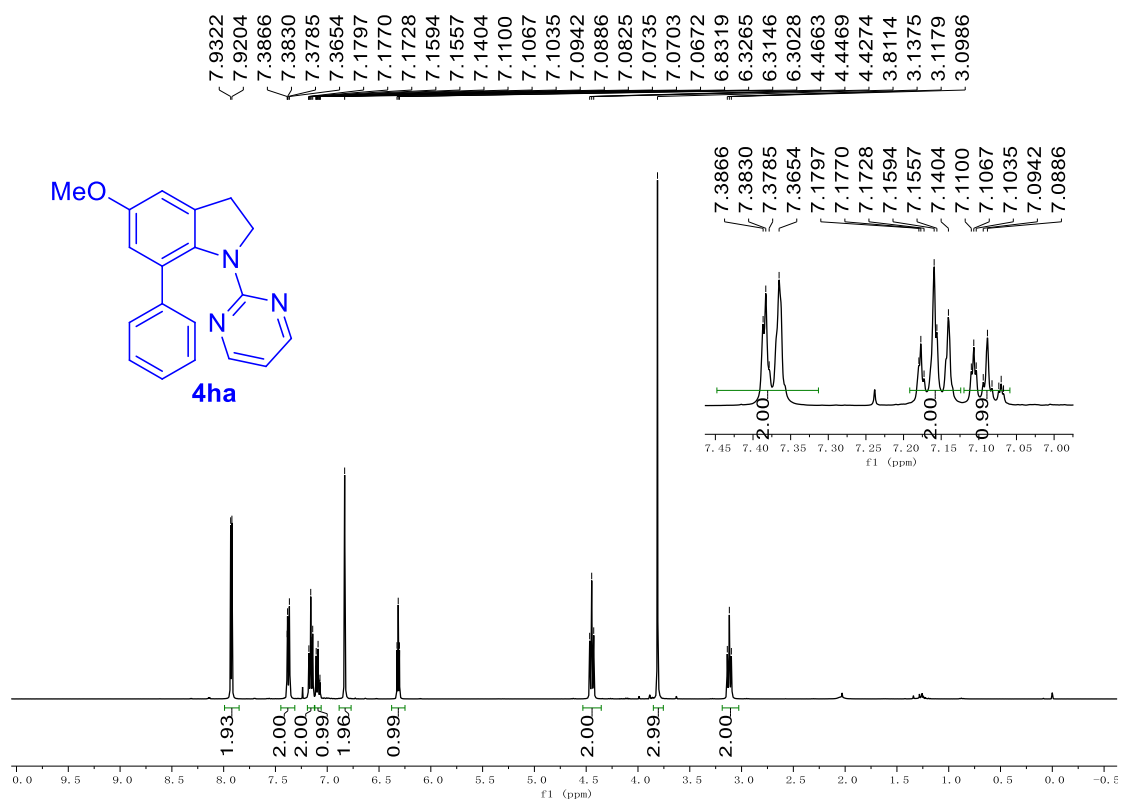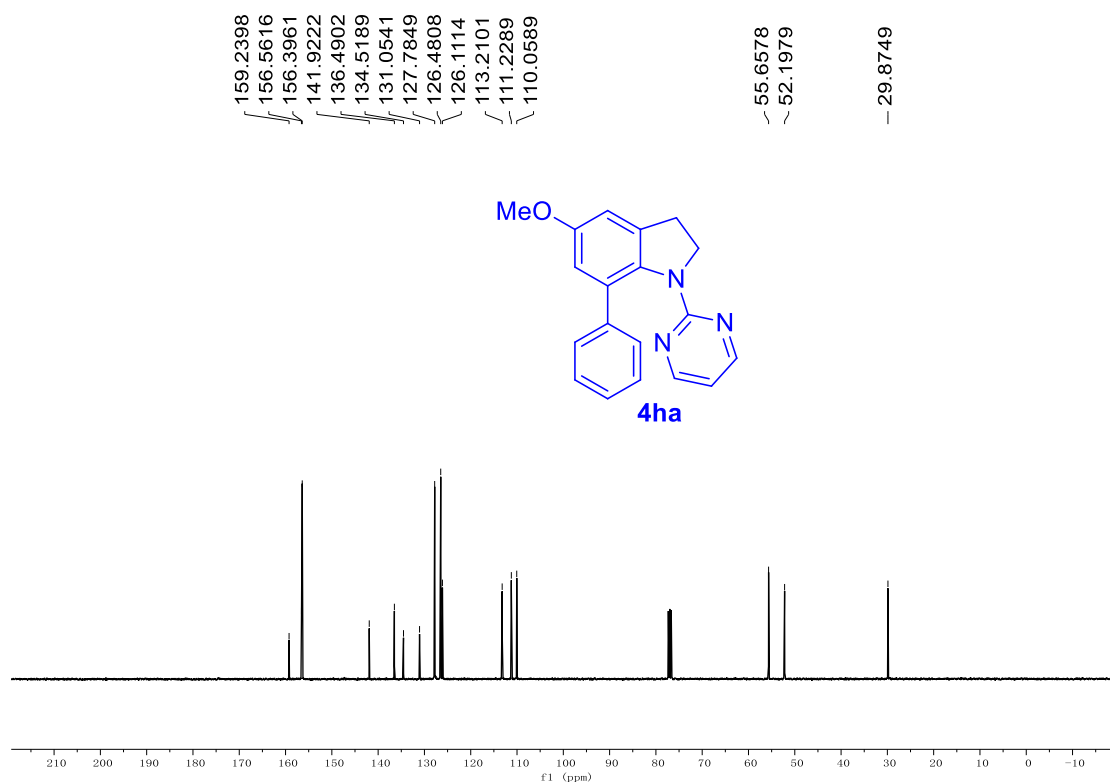

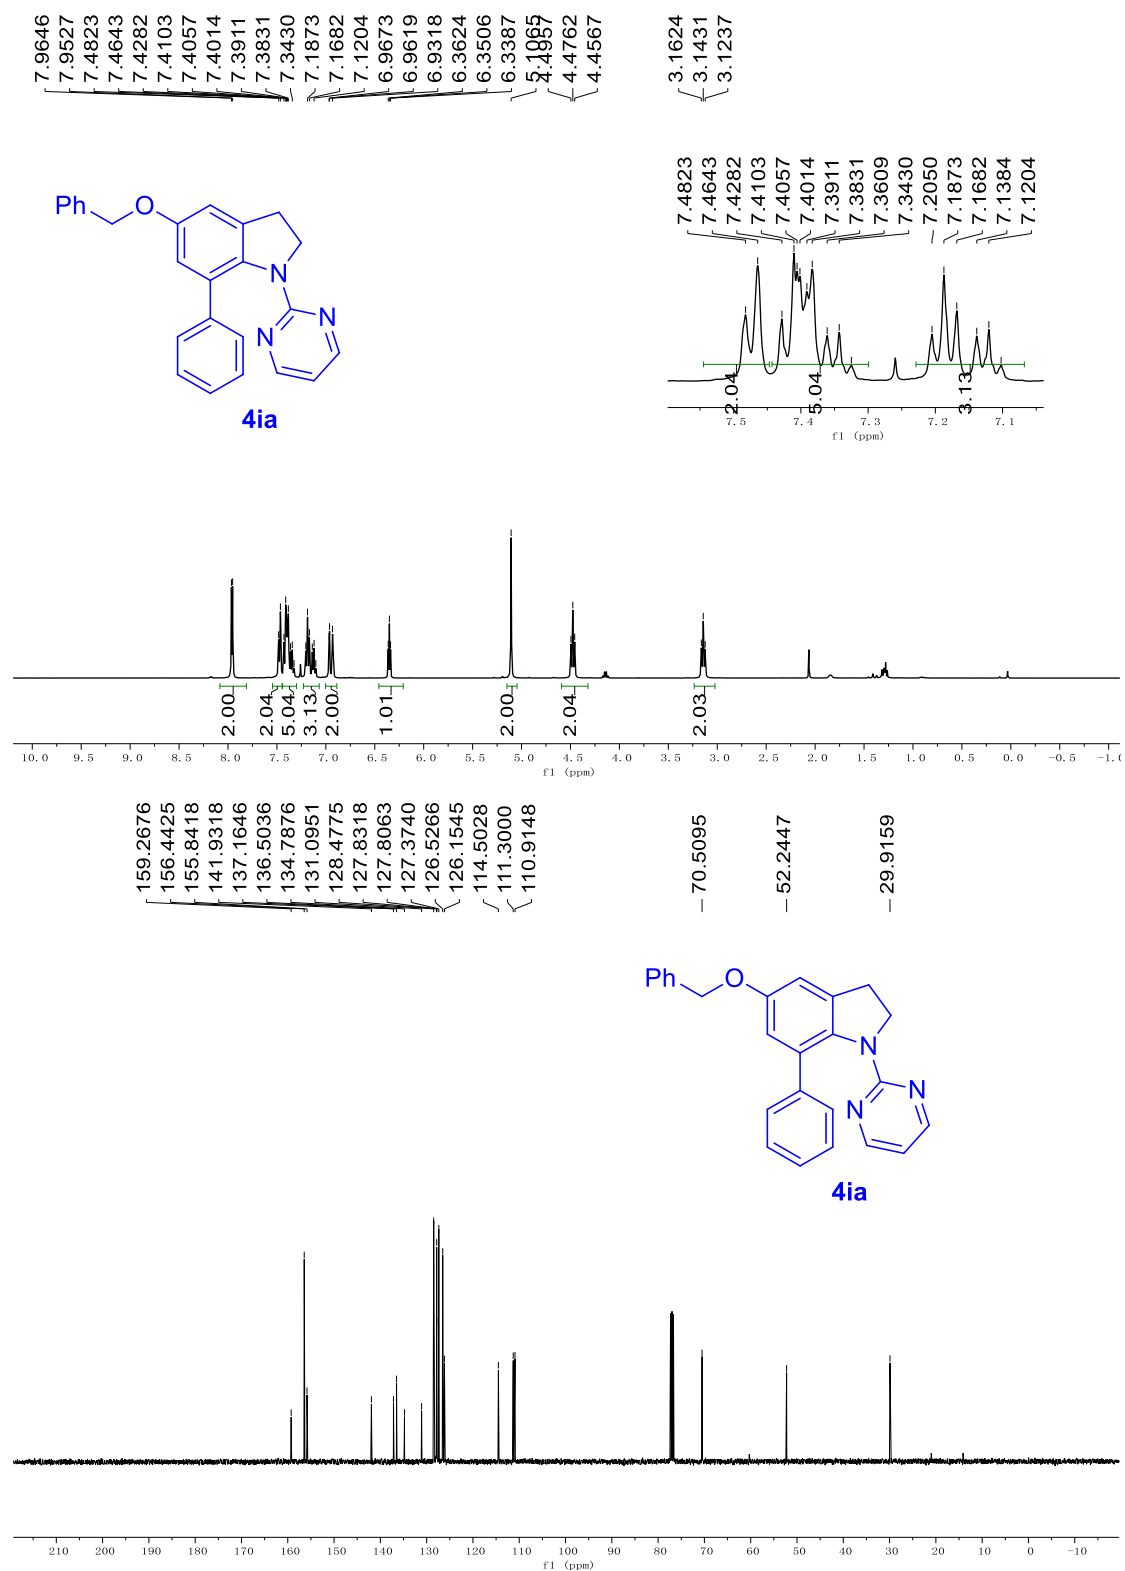

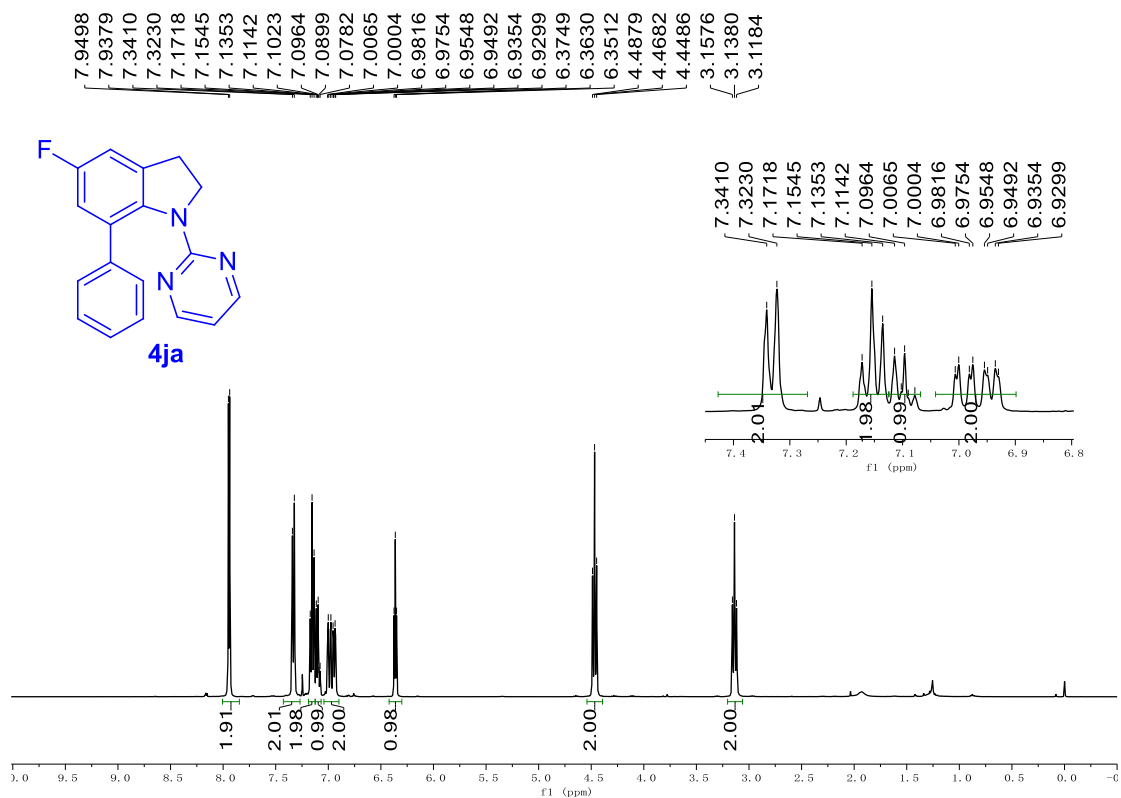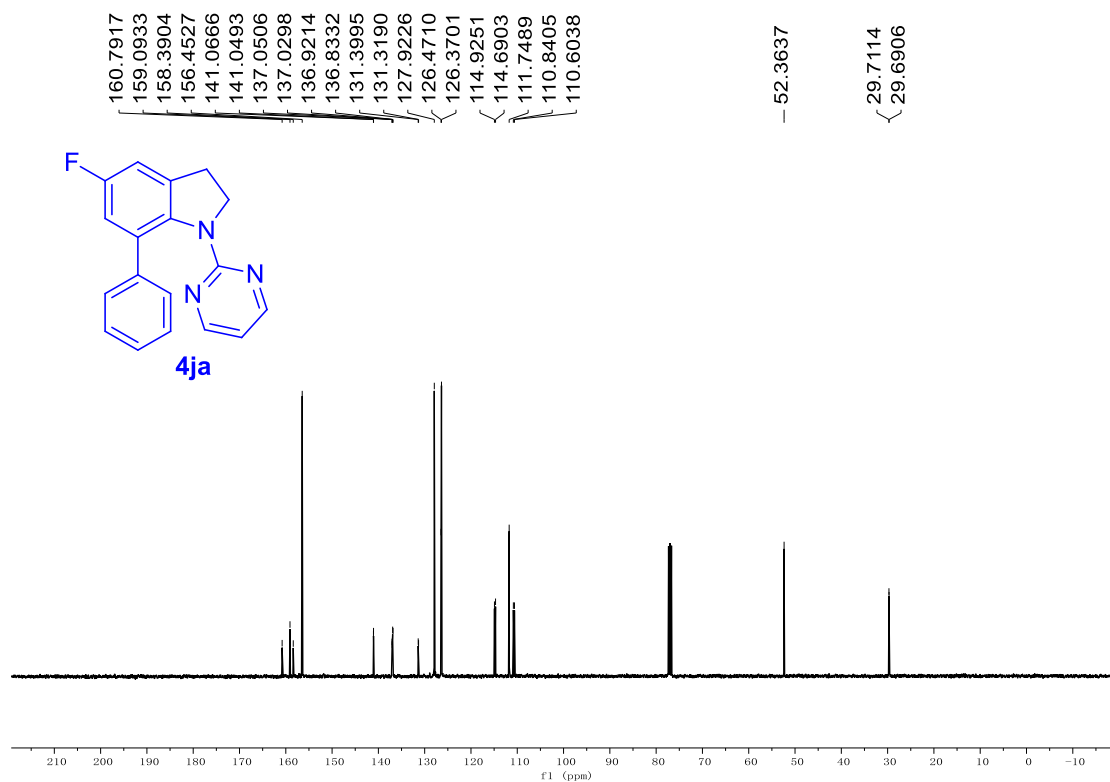

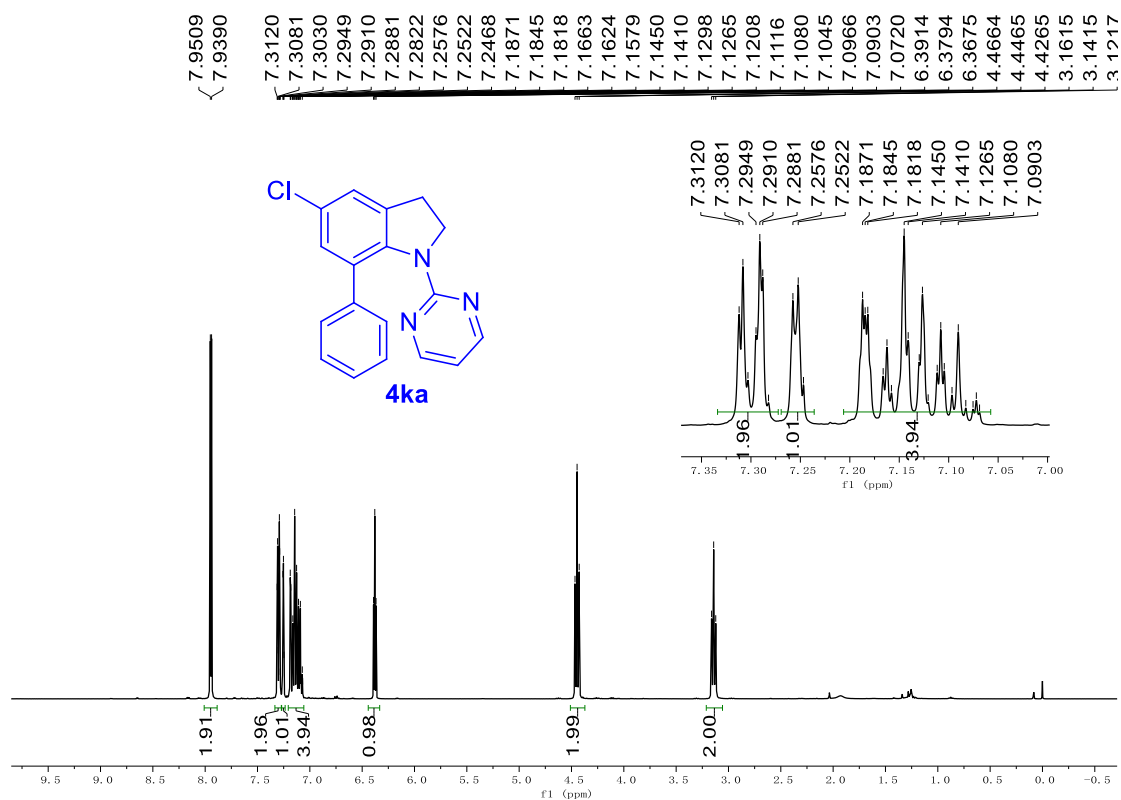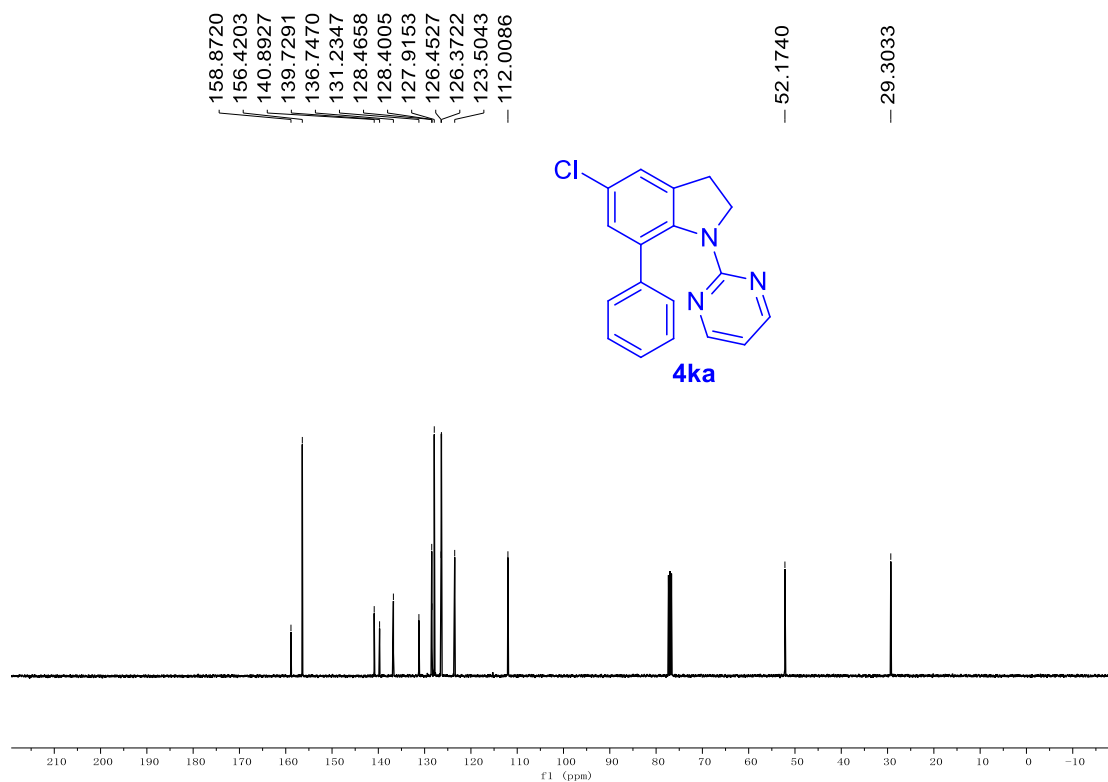

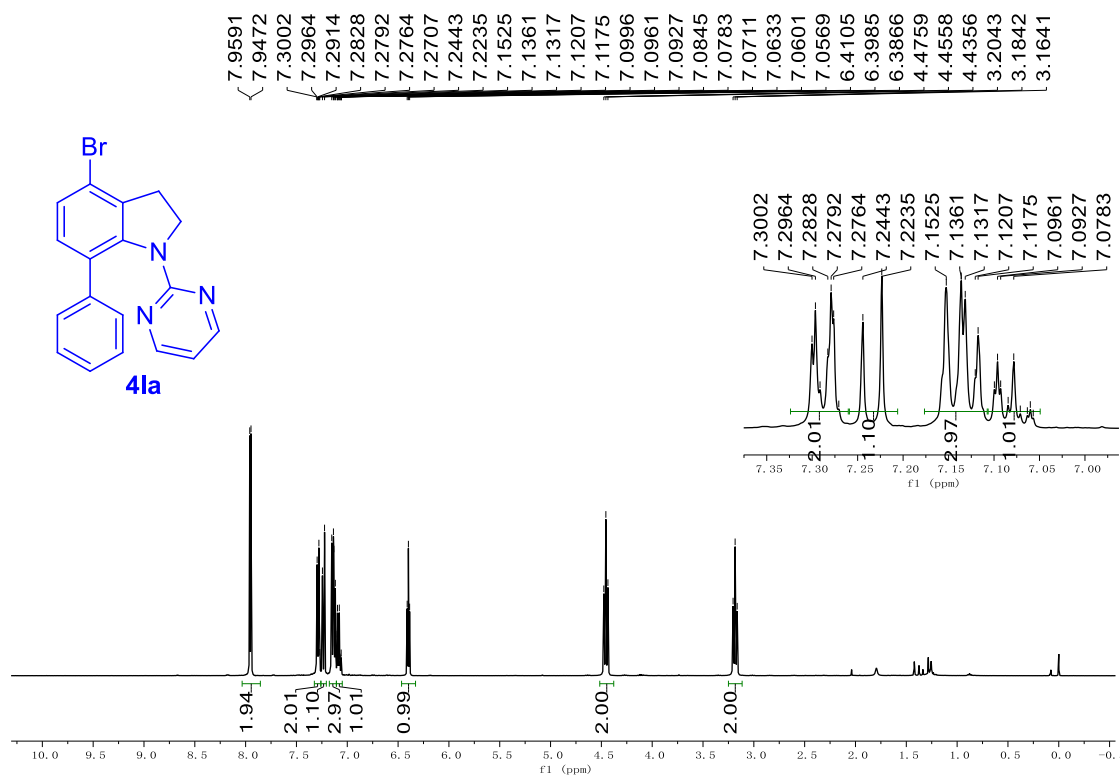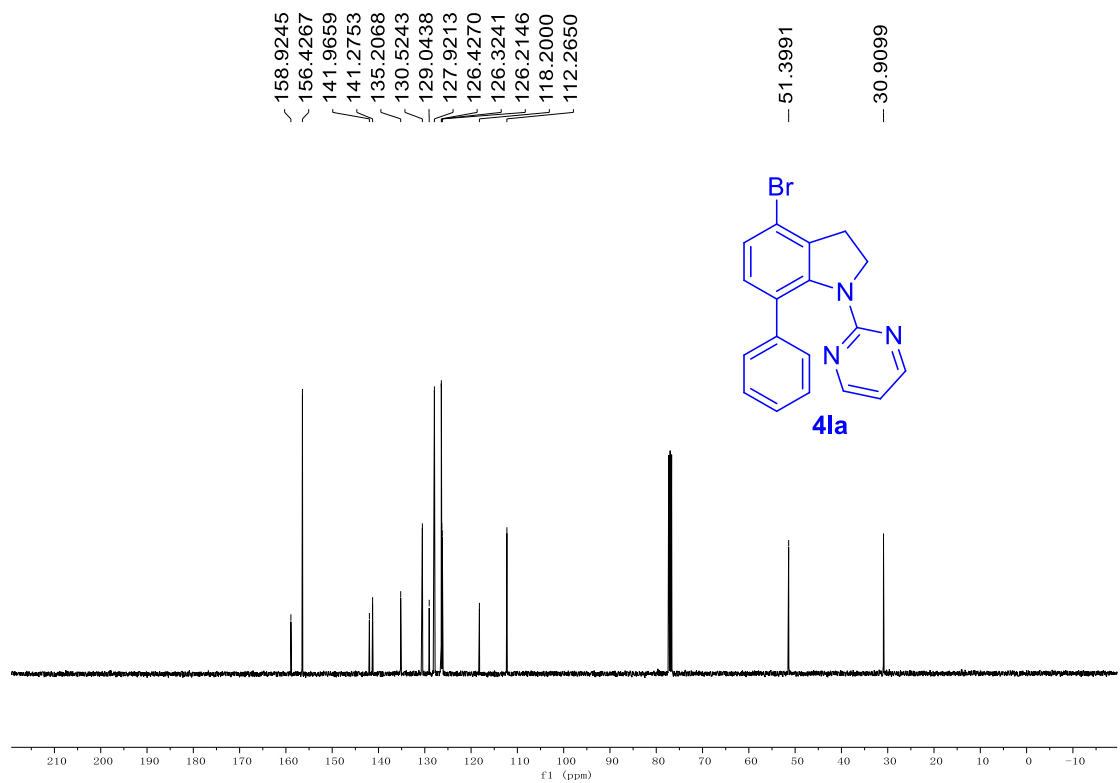

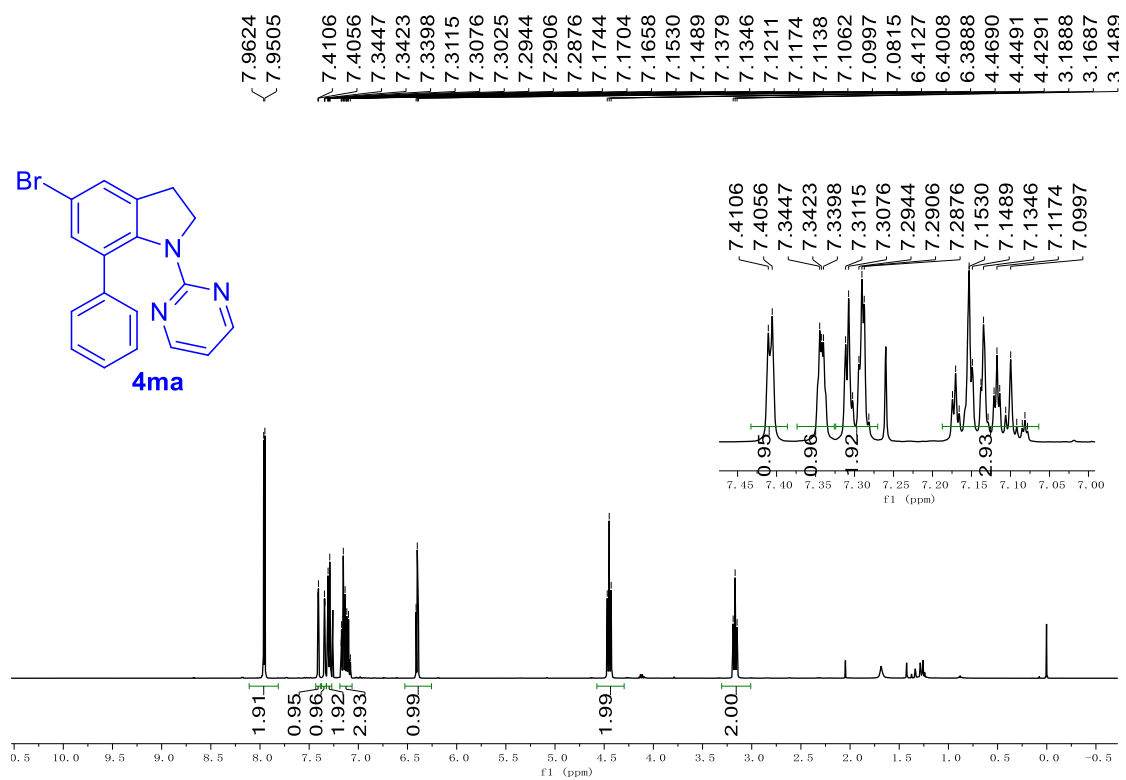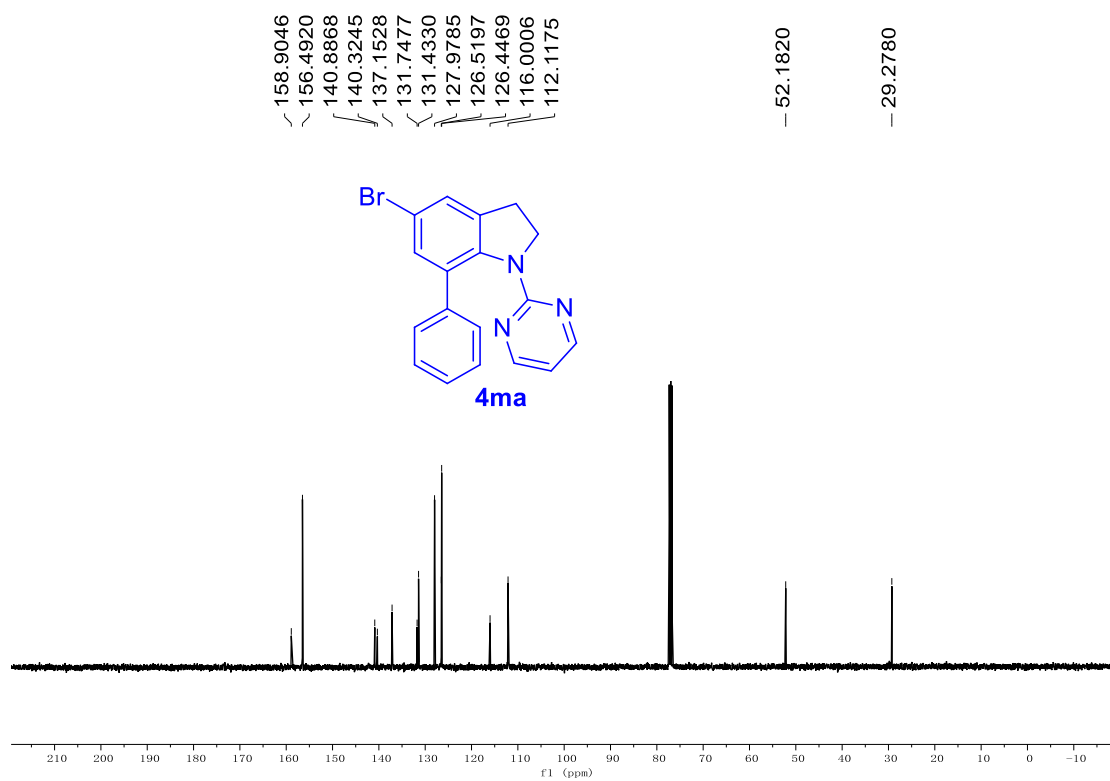

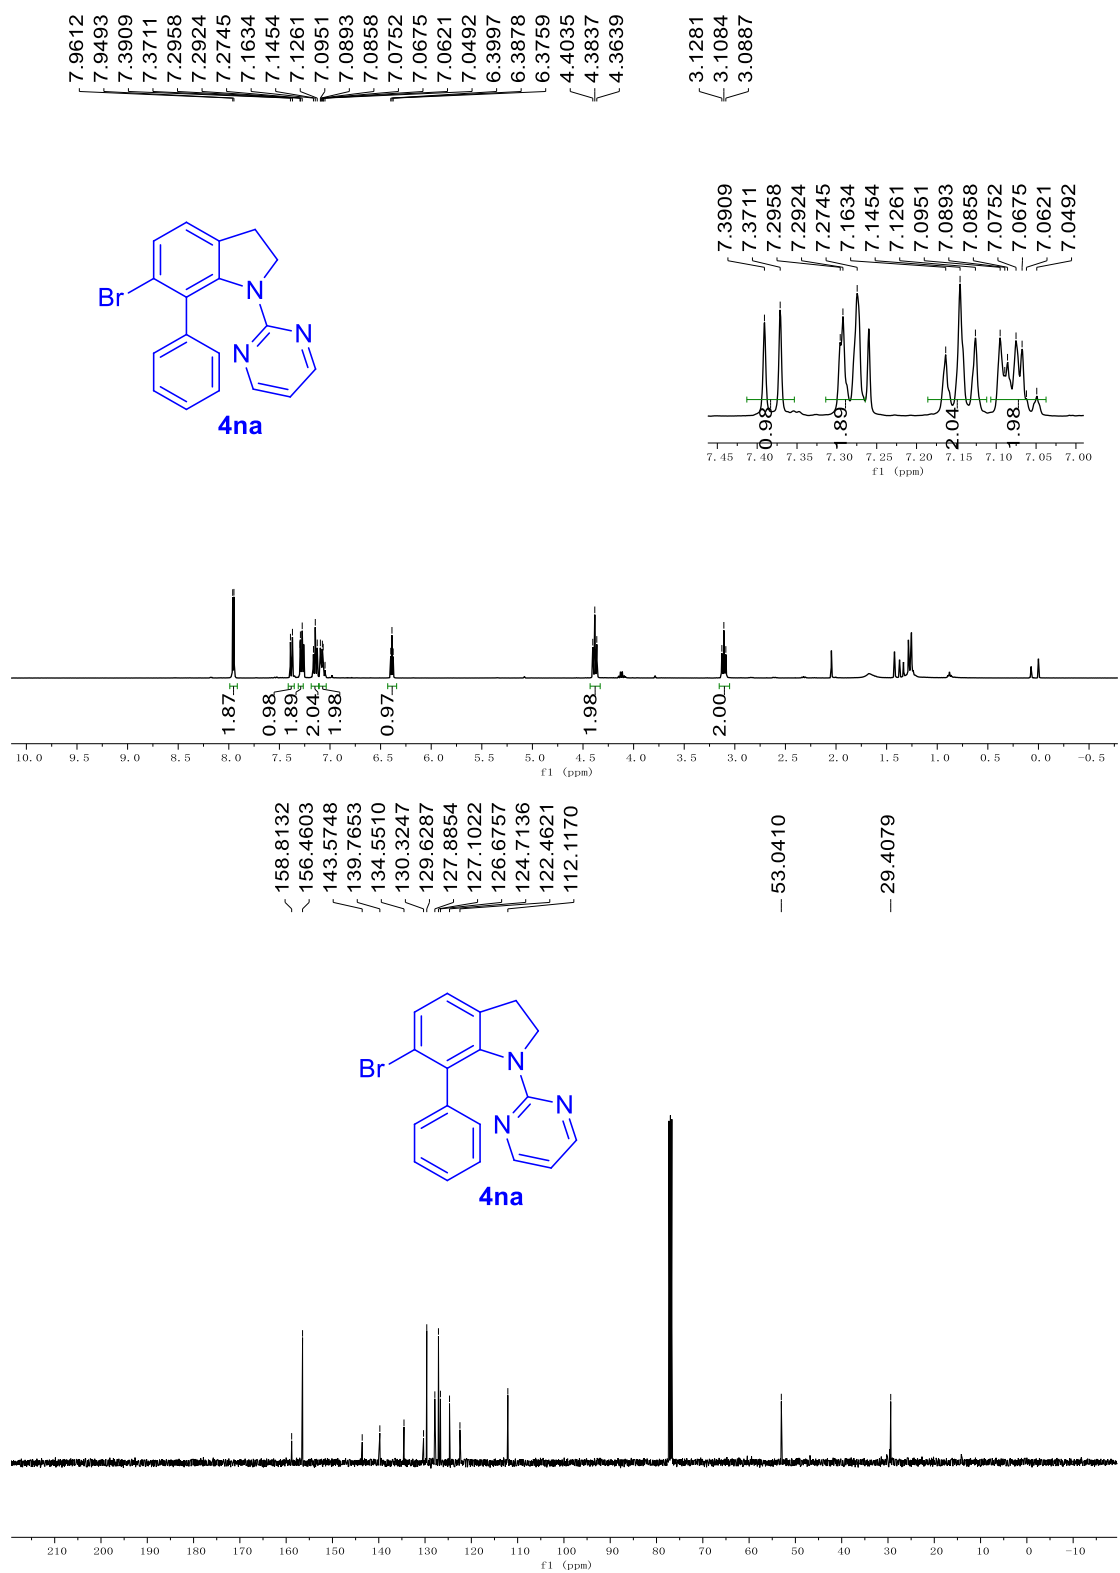

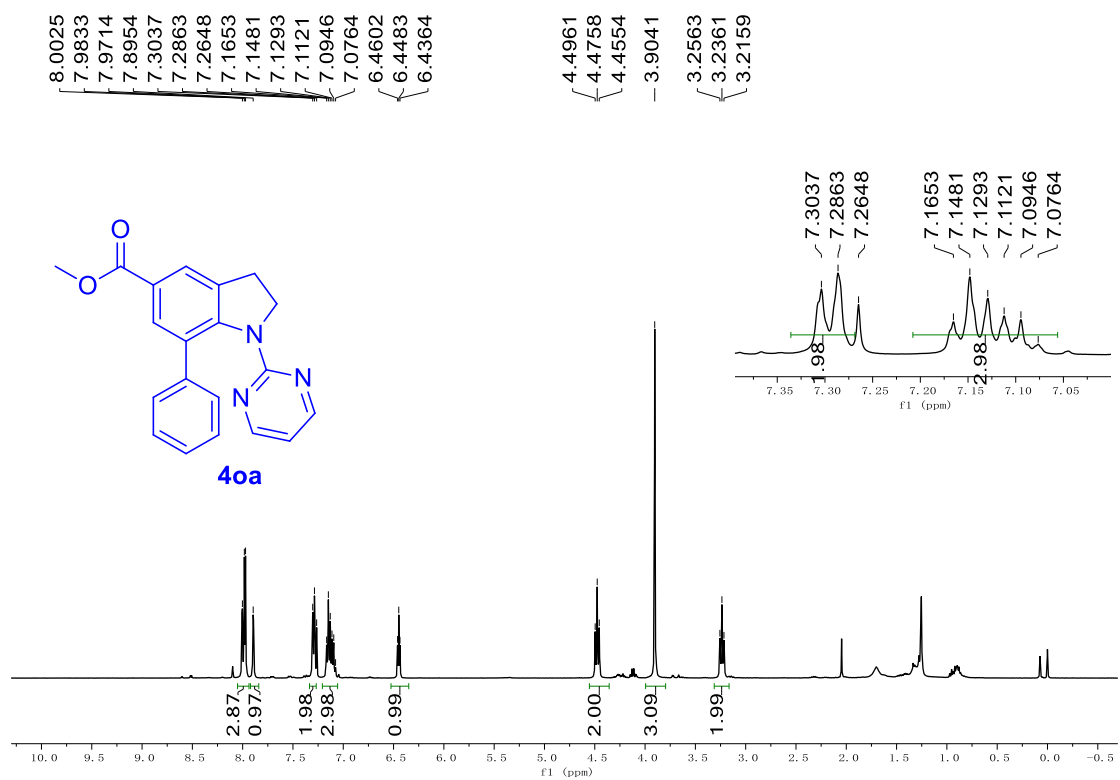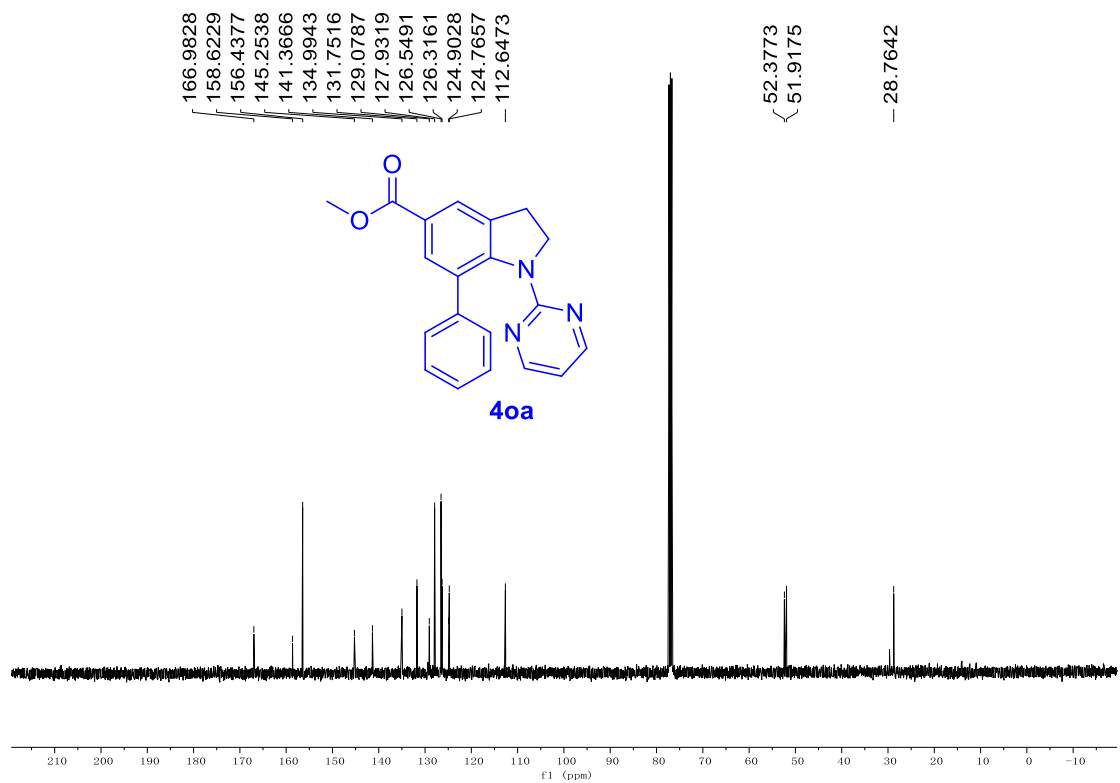



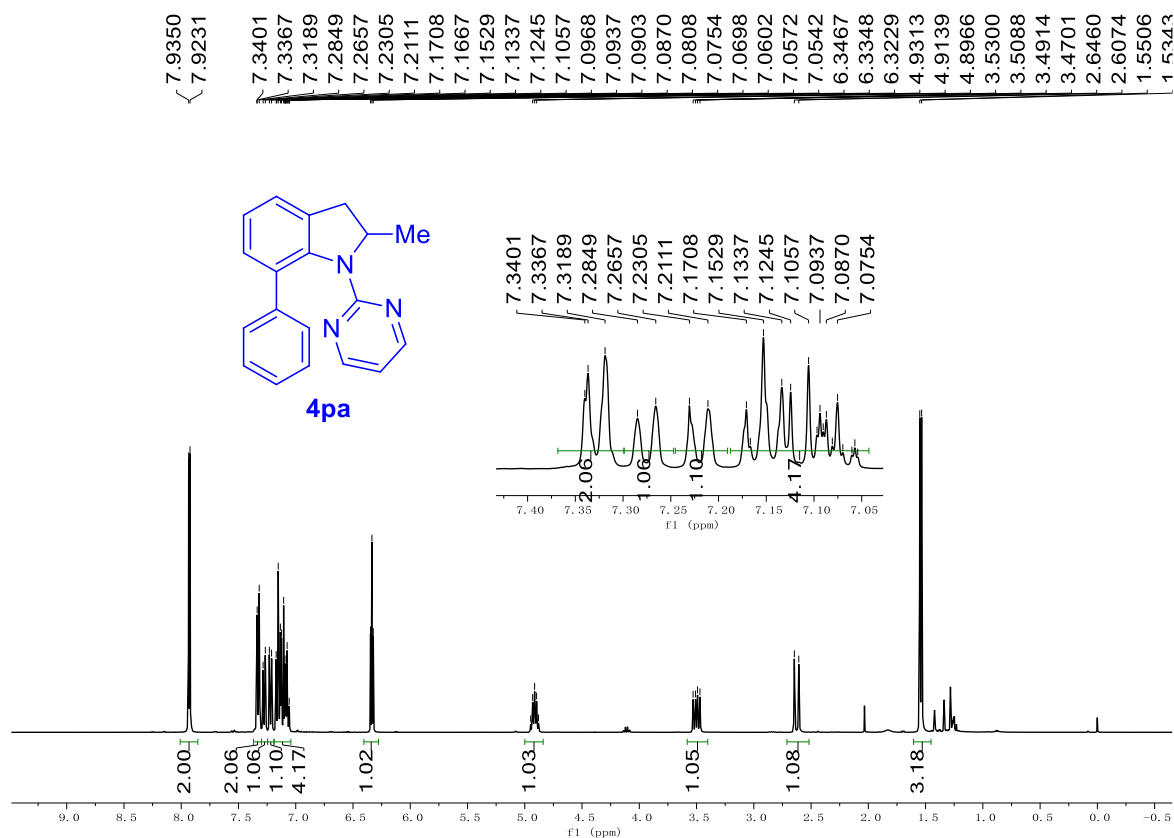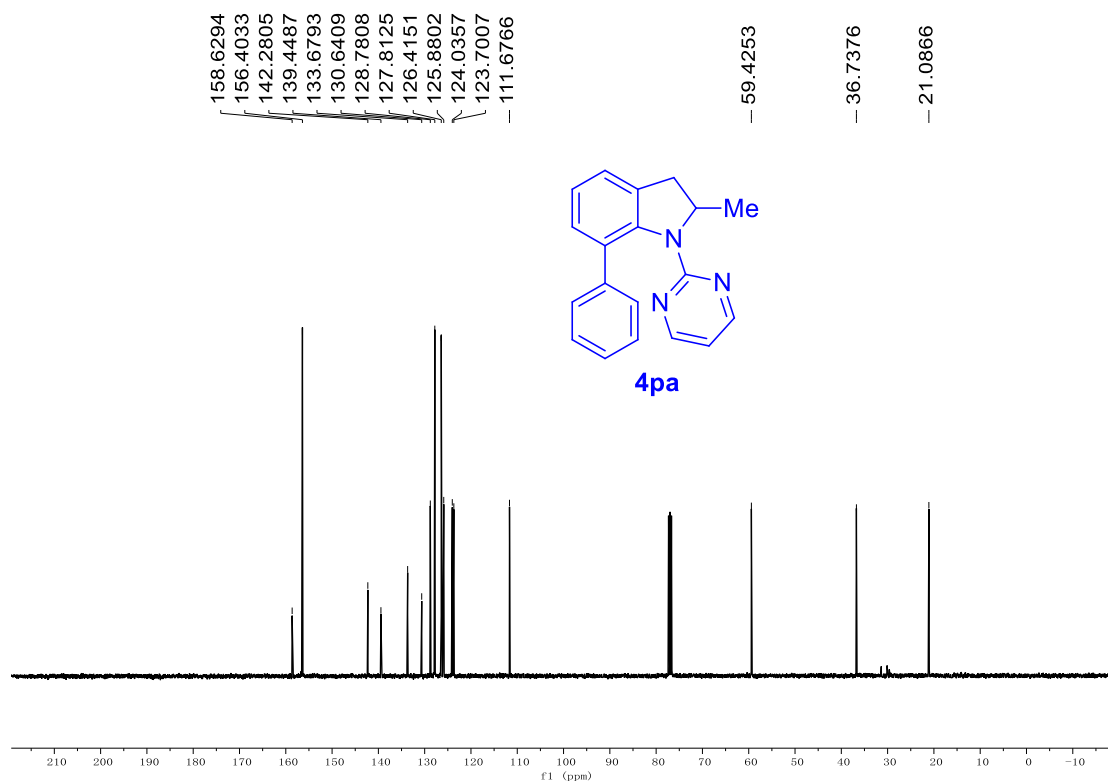

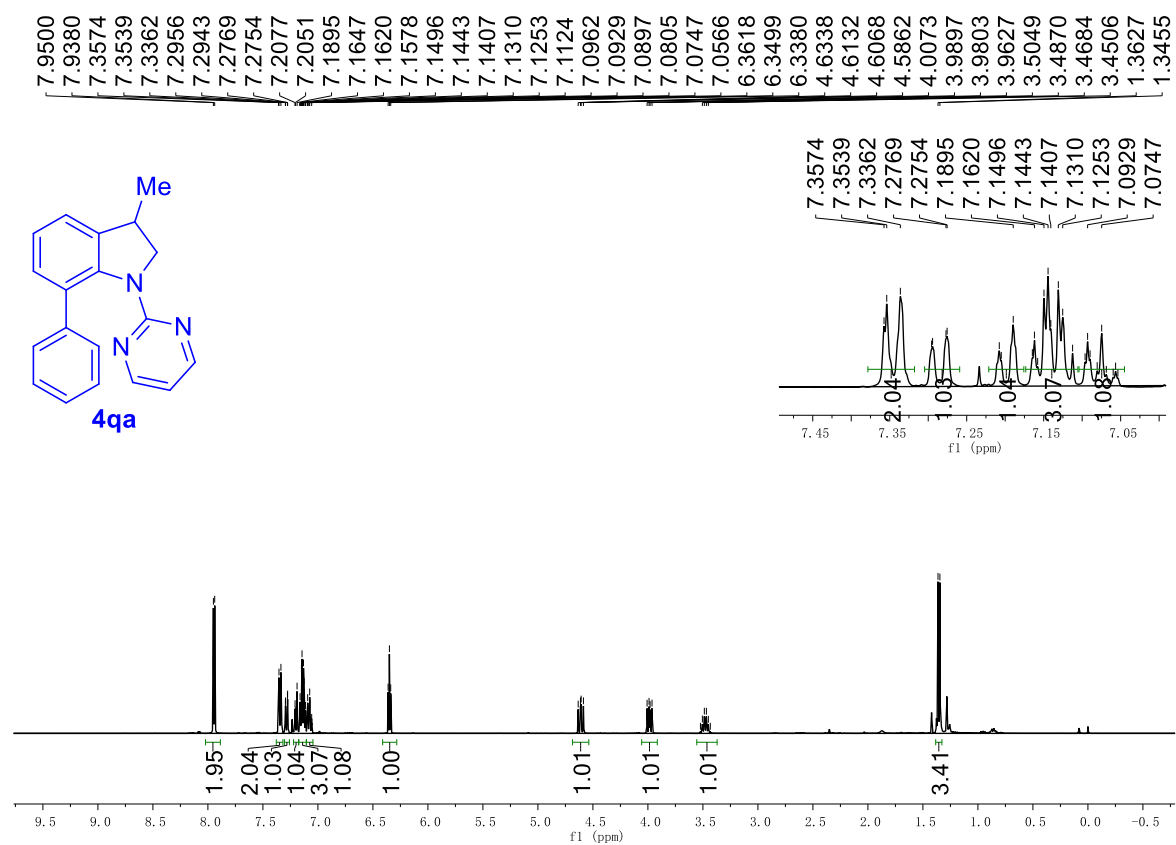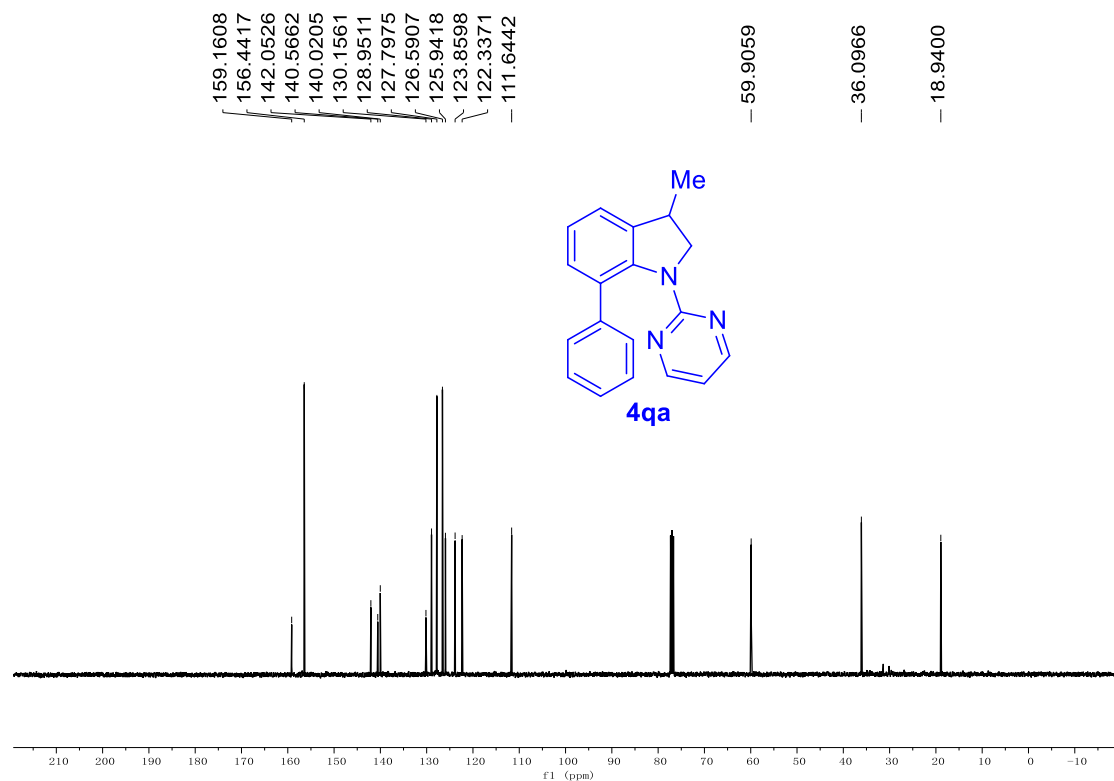

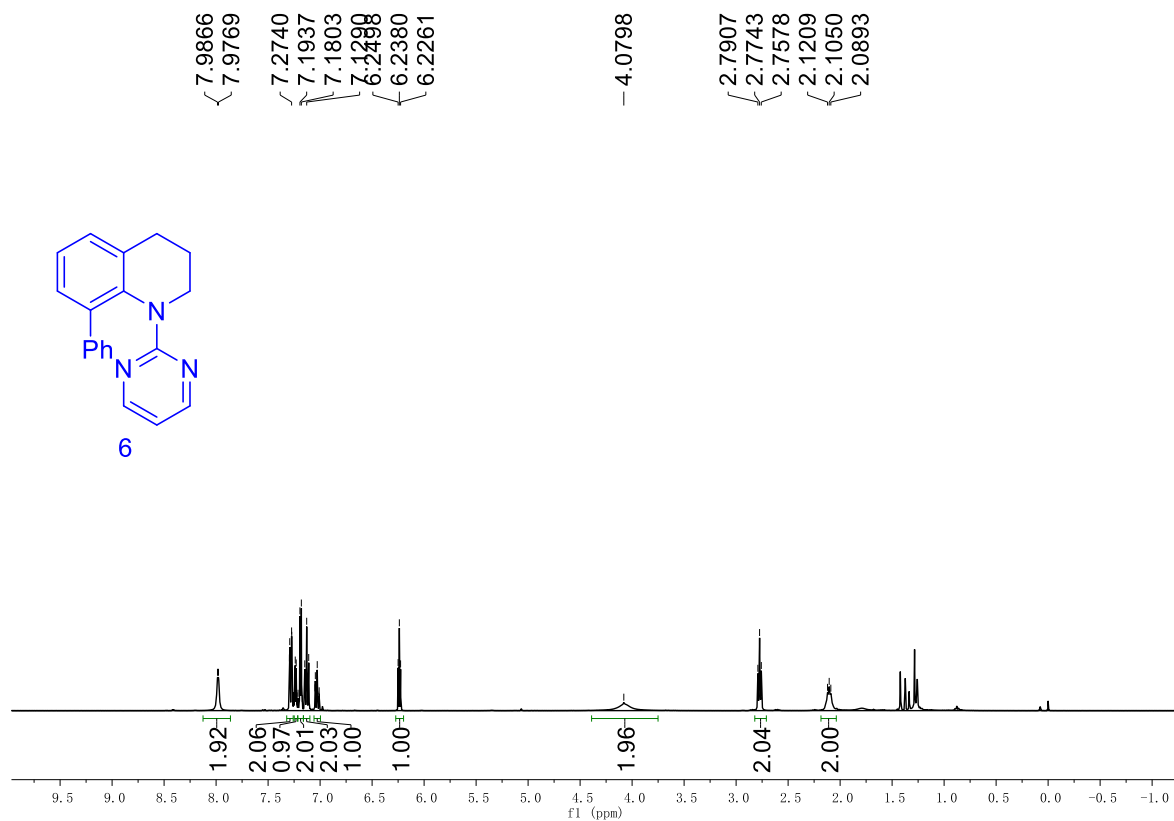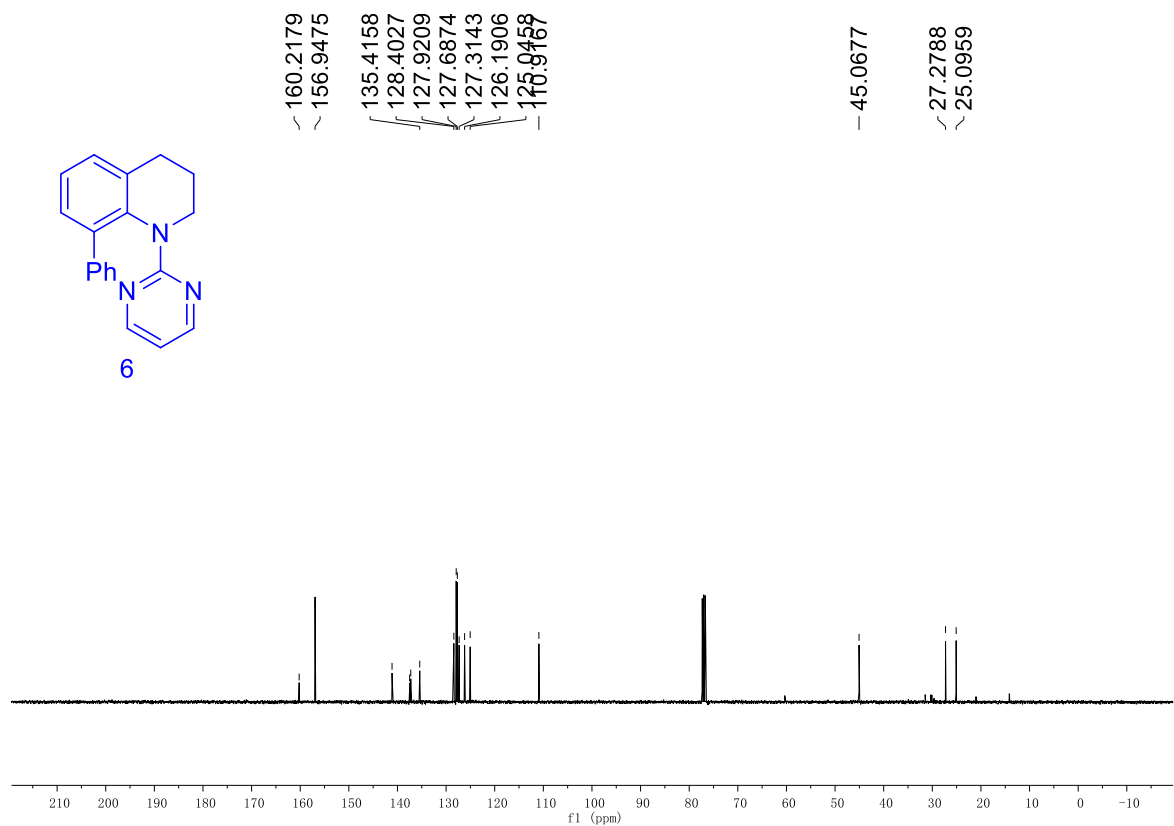

8.1671  
8.1551  
7.7940  
7.7853  
7.6773  
7.6628  
7.6572  
7.6460  
7.6404  
7.6259  
7.3335  
7.3152  
7.3016  
7.2974  
7.2838  
7.2286  
7.2181  
7.2087  
7.1996  
7.1943  
7.1858  
7.0914  
7.0892  
7.0810  
7.0748  
6.7731  
6.7667  
6.7547  
6.7427

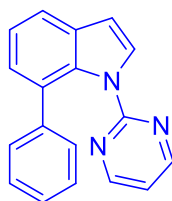

7

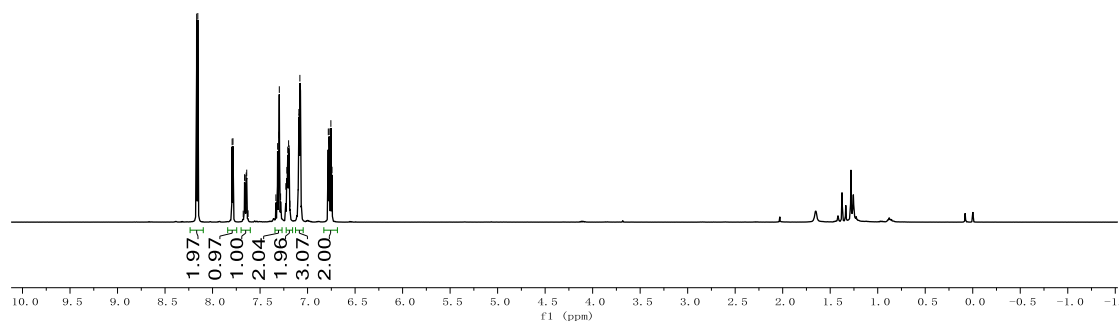

156.9907  
156.8748  
142.0518  
132.7307  
131.9976  
129.2152  
128.5094  
127.7072  
127.4784  
125.8570  
125.5692  
122.0902  
120.1579  
116.6287  
106.3197

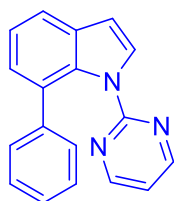

7

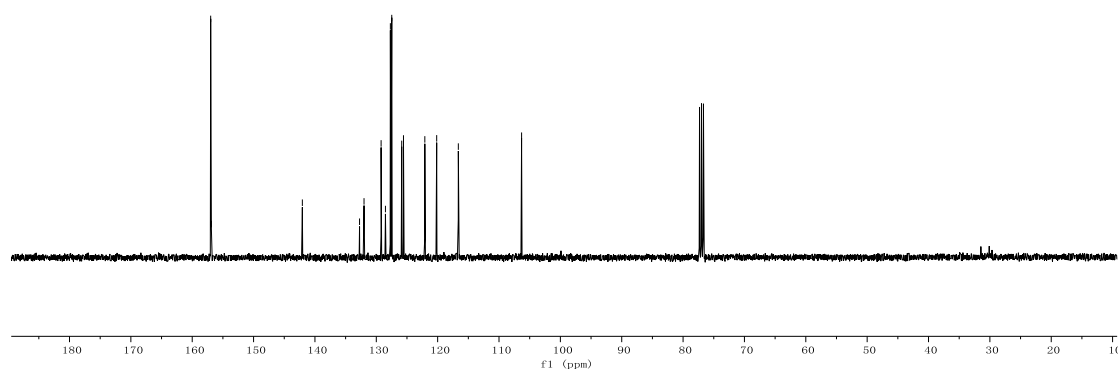

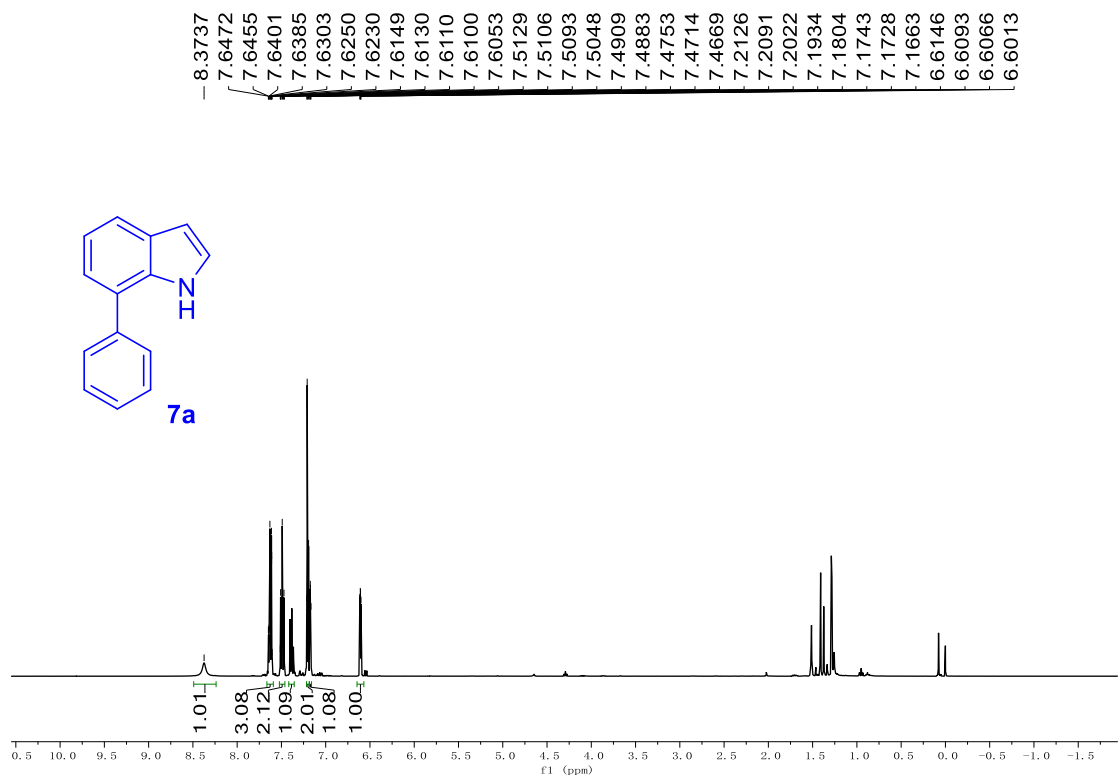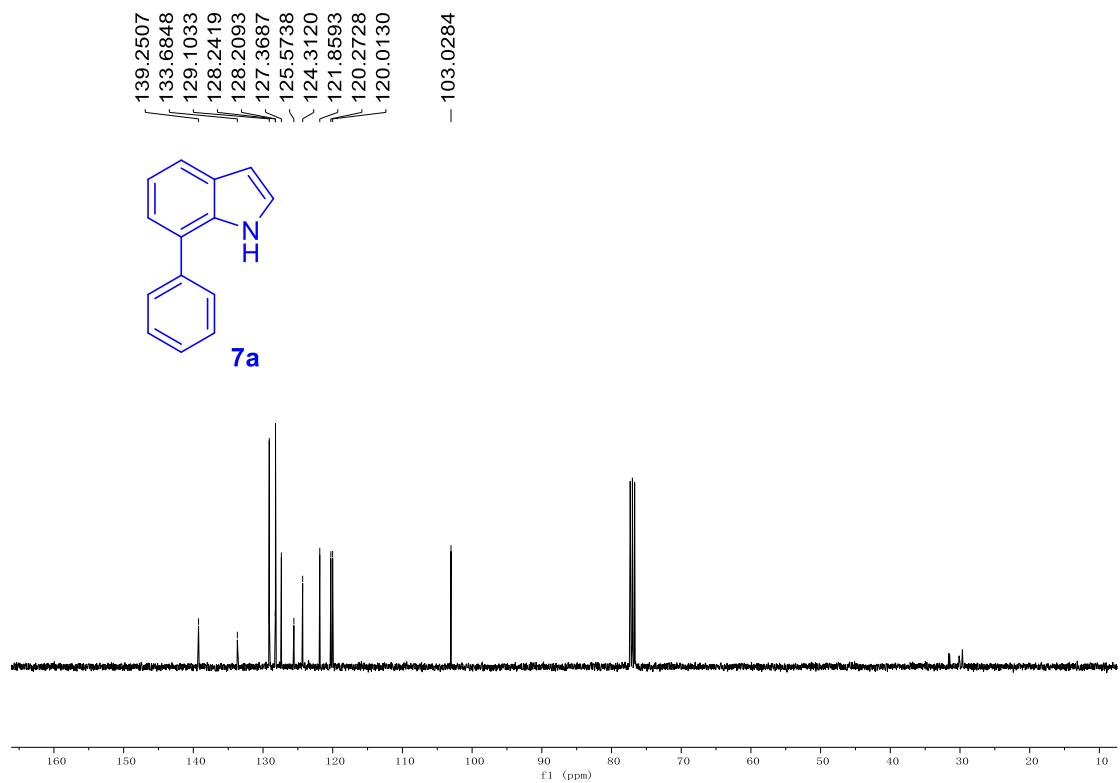

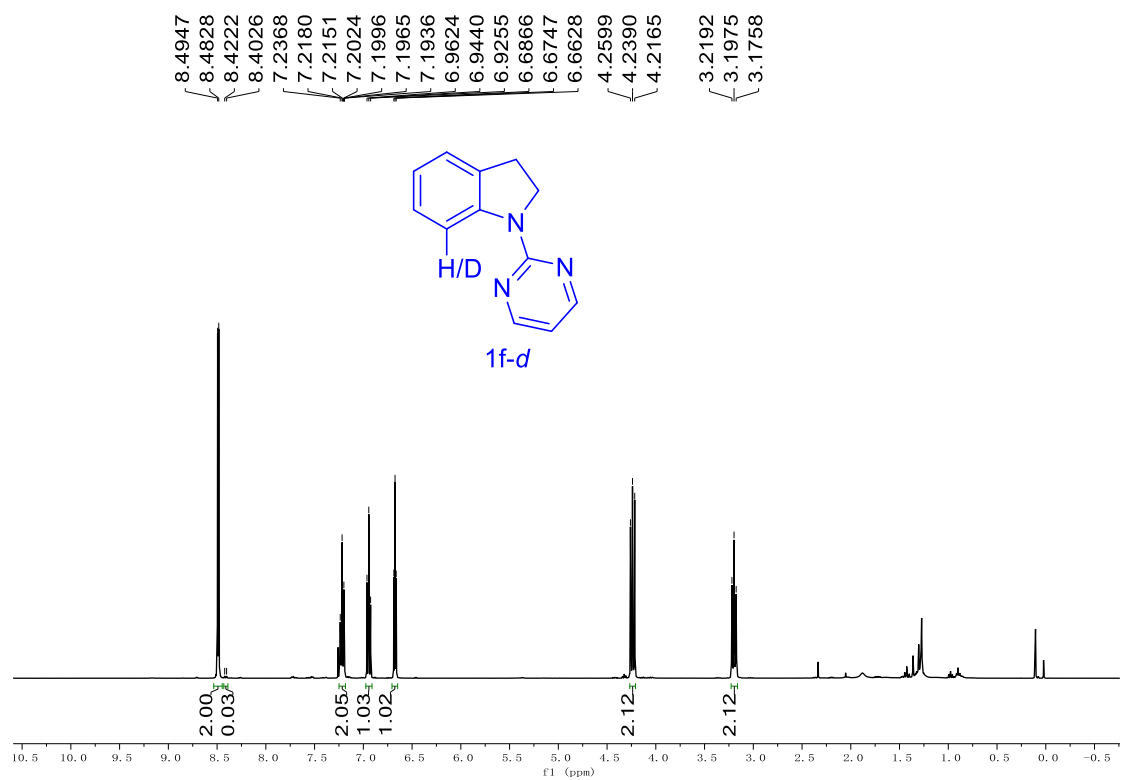

Supplement: c9ra04142g1.pdf [file c9ra04142g1.pdf]
